# Supplementary material for: Single Cell Visualization of Yeast Gene Expression Shows Correlation of Epigenetic Switching between Multiple Heterochromatic Regions through Multiple Generations
Source: PLoS Biol. 2013 Jul 2;11(7):e1001601. doi: 10.1371/journal.pbio.1001601 (PMC3699475; doi:10.1371/journal.pbio.1001601)
Supplement: Table S7 — Fluorescence intensity in PEV strains with three different fluorescence proteins. (A) Fluorescence intensity in HMR-left PEV/TEL-VR PEV/Euchromatin (FUY488) (related Figure S3A). (B) Fluorescence intensity of HMR-left PEV/HMR-right PEV/Euchromatin (FUY492) (related Figure S3B). (C) Fluorescence intensity in HML-right PEV/HMR-left PEV/Euchromatin (FUY804) (related Figure S3C). (D) Fluorescence intensity in cells transformed with HML-right PEV/TEL-VR PEV/Euchromatin (FUY806) (related Figure S3D). (E) Fluorescence intensity in HML-right PEV/HMR-right PEV/Euchromatin (FUY810) (related Figure 8C). (XLSX) [file pbio.1001601.s010.xlsx]

## Sheet: Sheet1
Table S7. Fluorescence intensity in PEV strains with three different fluorescence proteins.
(A) HMR-left PEV/TEL-VR PEV/Euchromatin
Original	Parent	Division time 0	Division time 1	Division time 2	Division time 3	Division time 4	Division time 5	Division time 6	Division time 7	Division time 8	Division time 9	Division time 10	Division time 11	Division time 12	Division time 13	Division time 14	Division time 15
Cell Number	Number	(daughter Number)	(daughter Number)	(daughter Number)	(daughter Number)	(daughter Number)	(daughter Number)	(daughter Number)	(daughter Number)	(daughter Number)	(daughter Number)	(daughter Number)	(daughter Number)	(daughter Number)	(daughter Number)	(daughter Number)	(daughter Number)
		[EYFP/mcherry]	[EYFP/mcherry]	[EYFP/mcherry]	[EYFP/mcherry]	[EYFP/mcherry]	[EYFP/mcherry]	[EYFP/mcherry]	[EYFP/mcherry]	[EYFP/mcherry]	[EYFP/mcherry]	[EYFP/mcherry]	[EYFP/mcherry]	[EYFP/mcherry]	[EYFP/mcherry]	[EYFP/mcherry]	[EYFP/mcherry]
		<ECFP/mcherry>	<ECFP/mcherry>	<ECFP/mcherry>	<ECFP/mcherry>	<ECFP/mcherry>	<ECFP/mcherry>	<ECFP/mcherry>	<ECFP/mcherry>	<ECFP/mcherry>	<ECFP/mcherry>	<ECFP/mcherry>	<ECFP/mcherry>	<ECFP/mcherry>	<ECFP/mcherry>	<ECFP/mcherry>	<ECFP/mcherry>
Cell No.1		ON/ON [≧1]<≧1>	ON/ON (Cell No.2) [≧1]<≧1>	ON/ON (Cell No.3) [≧1]<≧1>	ON/ON (Cell No.5) [≧1]<≧1>	ON/ON (Cell No.8) [0.6]<≧1>	OFF/ON (Cell No.9) [0.3]<≧1>	OFF/ON (Cell No.22) [0.2]<0.5>	ON/ON (Cell No.31) [0.7]<≧1>	OFF/ON (N/D) [0.3]<0.6>	ON/ON (N/D) [0.4]<0.6>	ON/ON (N/D) [≧1]<≧1>	ON/ON (N/D) [0.5]<0.6>	ON/ON (N/D) [0.4]<0.7>	ON/ON (N/D) [≧1]<≧1>	death
Cell No.2	Cell No.1	ON/ON [≧1]<0.6>	ON/ON (Cell No.4) [0.9]<0.8>	OFF/ON (Cell No.6) [0.3]<0.7>	ON/ON (Cell No.10) [0.4]<0.5>	ON/ON (Cell No.17) [≧1]<0.9>	ON/ON (Cell No.32) [≧1]<≧1>	ON/ON (Cell No.44) [0.4]<0.6>	ON/ON (N/D) [0.4]<0.4>	ON/ON (N/D) [≧1]<≧1>	ON/ON (N/D) [0.4]<≧1>	OFF/ON (N/D) [0.3]<≧1>	OFF/ON (N/D) [0.1]<≧1>	OFF/ON (N/D) [0.2]<0.8>	OFF/ON (N/D) [0]<≧1>	OFF/ON (N/D) [0]<0.7>	N/D
Cell No.3	Cell No.1	ON/ON [≧1]<≧1>	ON/ON (Cell No.7) [≧1]<≧1>	ON/ON (Cell No.11) [≧1]<0.8>	ON/ON (Cell No.18) [0.5]<≧1>	OFF/ON (N/D) [0.1]<≧1>	OFF/ON (Cell No.45) [0.2]<≧1>	OFF/ON (N/D) [0.1]<0.5>	ON/ON (N/D) [0.5]<≧1>	ON/ON (N/D) [0.6]<≧1>	ON/ON (N/D) [0.9]<0.8>	ON/ON (N/D) [≧1]<0.9>	ON/OFF (N/D) [0.6]<0.3>	ON/OFF (N/D) [0.4]<0.3>	N/D
Cell No.4	Cell No.2	ON/ON [0.5]<0.8>	OFF/ON (Cell No.12) [0.3]<0.8>	ON/ON (Cell No.19) [≧1]<≧1>	ON/ON (Cell No.33) [≧1]<≧1>	ON/ON (Cell No.46) [0.9]<≧1>	ON/ON (N/D) [≧1]<0.9>	ON/ON (N/D) [≧1]<≧1>	ON/ON (N/D) [0.6]<0.9>	ON/ON (N/D) [0.9]<≧1>	ON/ON (N/D) [0.9]<0.7>	ON/ON (N/D) [0.9]<0.4>	ON/ON (N/D) [0.5]<0.9>	OFF/ON (N/D) [0.3]<0.5>	N/D
Cell No.5	Cell No.1	ON/ON [≧1]<≧1>	ON/ON (Cell No.13) [0.6]<≧1>	ON/ON (Cell No.20) [≧1]<≧1>	ON/ON (Cell No.34) [≧1]<≧1>	ON/ON (N/D) [≧1]<≧1>	ON/ON (N/D) [0.4]<≧1>	OFF/ON (N/D) [0]<≧1>	OFF/ON (N/D) [0]<0.7>	ON/ON (N/D) [0.6]<≧1>	ON/ON (N/D) [0.7]<0.8>	ON/ON (N/D) [0.4]<0.6>	ON/ON (N/D) [0.9]<0.6>	N/D
Cell No.6	Cell No.2	ON/ON [0.8]<0.5>	OFF/ON (Cell No.14) [0.3]<0.8>	ON/ON (Cell No.21) [0.7]<≧1>	ON/ON (Cell No.35) [0.6]<≧1>	OFF/ON (N/D) [0.2]<≧1>	ON/ON (N/D) [0.6]<≧1>	ON/ON (N/D) [0.9]<≧1>	ON/ON (N/D) [0.6]<≧1>	ON/ON (N/D) [0.7]<≧1>	ON/ON (N/D) [0.6]<≧1>	ON/ON (N/D) [0.8]<0.9>	ON/ON (N/D) [0.9]<0.8>	frame out
Cell No.7	Cell No.3	ON/ON [0.5]<0.5>	OFF/ON (Cell No.15) [0.2]<0.5>	OFF/ON (Cell No.23) [0.1]<0.6>	OFF/ON (Cell No.47) [0]<≧1>	OFF/ON (N/D) [0]<≧1>	OFF/ON (N/D) [0]<≧1>	OFF/ON (N/D) [0]<≧1>	OFF/ON (N/D) [0]<≧1>	OFF/ON (N/D) [0]<0.9>	ON/ON (N/D) [0.4]<0.7>	ON/ON (N/D) [0.9]<≧1>	ON/ON (N/D) [0.5]<≧1>	OFF/ON (N/D) [0.3]<≧1>	N/D
Cell No.8	Cell No.1	ON/ON [0.5]<≧1>	ON/ON (Cell No.16) [0.4]<0.9>	OFF/ON (Cell No.24) [0.1]<≧1>	ON/ON (Cell No.36) [0.7]<≧1>	ON/ON (N/D) [0.9]<0.9>	ON/ON (N/D) [0.4]<0.7>	ON/ON (N/D) [0.5]<≧1>	OFF/ON (N/D) [0.3]<≧1>	ON/ON (N/D) [0.8]<≧1>	ON/ON (N/D) [≧1]<≧1>	frame out
Cell No.9	Cell No.1	ON/ON [0.6]<0.9>	ON/OFF (Cell No.25) [0.5]<0.2>	ON/OFF (Cell No.37) [0.6]<0.1>	ON/ON (N/D) [0.6]<0.6>	OFF/OFF (N/D) [0.1]<0.3>	OFF/ON (N/D) [0]<≧1>	OFF/ON (N/D) [0.1]<≧1>	ON/ON (N/D) [0.6]<≧1>	ON/ON (N/D) [0.7]<0.6>	ON/ON (N/D) [≧1]<≧1>	ON/ON (N/D) [0.8]<0.4>	frame out
Cell No.10	Cell No.2	ON/ON [0.5]<0.9>	ON/ON (Cell No.26) [0.9]<0.8>	ON/ON (N/D) [0.7]<0.7>	ON/ON (N/D) [0.8]<0.5>	ON/ON (N/D) [0.9]<≧1>	ON/ON (N/D) [0.4]<≧1>	ON/ON (N/D) [0.5]<0.7>	ON/ON (N/D) [0.4]<0.4>	ON/ON (N/D) [≧1]<≧1>	ON/ON (N/D) [≧1]<≧1>	ON/ON (N/D) [≧1]<≧1>	frame out
Cell No.11	Cell No.3	ON/ON [≧1]<≧1>	ON/ON (Cell No.27) [≧1]<≧1>	ON/ON (N/D) [0.4]<≧1>	OFF/ON (N/D) [0]<0.9>	OFF/ON (N/D) [0]<≧1>	OFF/ON (N/D) [0]<0.6>	OFF/ON (N/D) [0]<≧1>	OFF/ON (N/D) [0]<≧1>	ON/ON (N/D) [0.4]<≧1>	ON/ON (N/D) [≧1]<≧1>	ON/ON (N/D) [0.5]<0.4>	death
Cell No.12	Cell No.4	ON/ON [≧1]<≧1>	ON/ON (Cell No.28) [≧1]<≧1>	ON/ON (N/D) [≧1]<≧1>	ON/ON (N/D) [0.9]<≧1>	ON/ON (N/D) [≧1]<0.7>	ON/ON (N/D) [0.5]<≧1>	OFF/ON (N/D) [0.2]<0.8>	OFF/ON (N/D) [0.2]<≧1>	OFF/ON (N/D) [0.2]<0.6>	ON/ON (N/D) [0.6]<0.8>	frame out
Cell No.13	Cell No.5	ON/ON [0.7]<≧1>	ON/ON (Cell No.29) [≧1]<0.9>	ON/ON (N/D) [≧1]<≧1>	ON/ON (N/D) [≧1]<≧1>	ON/ON (N/D) [≧1]<≧1>	ON/ON (N/D) [0.9]<≧1>	ON/ON (N/D) [≧1]<≧1>	ON/ON (N/D) [0.8]<≧1>	ON/ON (N/D) [≧1]<≧1>	ON/ON (N/D) [≧1]<≧1>	frame out
Cell No.14	Cell No.6	ON/ON [0.6]<≧1>	ON/ON (Cell No.30) [0.4]<0.9>	ON/ON (Cell No.40) [≧1]<0.8>	ON/ON (N/D) [≧1]<≧1>	ON/ON (N/D) [≧1]<0.7>	OFF/ON (N/D) [0.3]<≧1>	OFF/OFF (N/D) [0.1]<0.3>	ON/ON (N/D) [0.6]<≧1>	ON/ON (N/D) [≧1]<≧1>	ON/ON (N/D) [≧1]<≧1>	ON/ON (N/D) [≧1]<≧1>	frame out
Cell No.15	Cell No.7	OFF/ON [0.2]<0.5>	OFF/OFF (Cell No.39) [0]<0.3>	OFF/OFF (N/D) [0]<0>	OFF/OFF (N/D) [0]<0>	OFF/OFF (N/D) [0]<0.3>	OFF/OFF (N/D) [0.1]<0.2>	OFF/ON (N/D) [0.2]<0.6>	frame out
Cell No.16	Cell No.8	ON/ON [0.6]<0.9>	ON/ON (N/D) [≧1]<0.8>	ON/ON (Cell No.48) [≧1]<≧1>	ON/ON (N/D) [≧1]<≧1>	OFF/ON (N/D) [0.3]<≧1>	OFF/ON (N/D) [0.1]<0.7>	OFF/ON (N/D) [0]<0.6>	OFF/ON (N/D) [0]<≧1>	OFF/ON (N/D) [0.1]<0.4>	frame out
Cell No.17	Cell No.2	ON/ON [0.9]<0.8>	ON/ON (N/D) [≧1]<≧1>	ON/ON (N/D) [0.8]<≧1>	ON/ON (N/D) [≧1]<0.5>	ON/ON (N/D) [0.8]<0.8>	ON/ON (N/D) [≧1]<≧1>	ON/ON (N/D) [0.5]<0.7>	ON/ON (N/D) [0.9]<≧1>	ON/ON (N/D) [≧1]<0.9>	ON/ON (N/D) [≧1]<0.8>	frame out
Cell No.18	Cell No.3	ON/ON [0.7]<≧1>	OFF/ON (Cell No.41) [0.2]<0.7>	OFF/ON (N/D) [0.3]<0.9>	OFF/ON (N/D) [0.2]<0.5>	ON/ON (N/D) [0.5]<≧1>	OFF/ON (N/D) [0.3]<0.8>	ON/ON (N/D) [0.9]<≧1>	ON/ON (N/D) [0.7]<≧1>	ON/ON (N/D) [≧1]<≧1>	ON/ON (N/D) [≧1]<0.7>	N/D
Cell No.19	Cell No.4	ON/ON [0.6]<0.9>	ON/ON (Cell No.42) [0.8]<≧1>	ON/ON (N/D) [0.5]<≧1>	OFF/ON (N/D) [0.2]<≧1>	ON/ON (N/D) [0.7]<≧1>	ON/ON (N/D) [0.6]<≧1>	OFF/ON (N/D) [0.3]<≧1>	OFF/ON (N/D) [0.3]<0.8>	OFF/ON (N/D) [0]<≧1>	OFF/ON (N/D) [0]<≧1>	N/D
Cell No.20	Cell No.5	ON/ON [0.6]<≧1>	OFF/ON (Cell No.43) [0.2]<≧1>	OFF/ON (N/D) [0]<≧1>	OFF/ON (N/D) [0]<≧1>	OFF/ON (N/D) [0.2]<≧1>	ON/ON (N/D) [0.5]<≧1>	OFF/ON (N/D) [0.3]<≧1>	OFF/OFF (N/D) [0.2]<0.3>	frame out
Cell No.21	Cell No.6	ON/ON [≧1]<≧1>	ON/ON (Cell No.38) [0.8]<≧1>	OFF/ON (N/D) [0.2]<≧1>	OFF/ON (N/D) [0.1]<≧1>	OFF/ON (N/D) [0]<0.9>	ON/ON (N/D) [0.4]<≧1>	OFF/ON (N/D) [0.3]<0.8>	ON/ON (N/D) [0.8]<0.7>	ON/ON (N/D) [0.8]<0.5>	ON/OFF (N/D) [0.5]<0.2>	frame out
Cell No.22	Cell No.1	OFF/ON [0.3]<≧1>	OFF/ON (Cell No.49) [0.3]<0.8>	ON/ON (N/D) [0.8]<≧1>	ON/ON (N/D) [0.5]<≧1>	ON/ON (N/D) [0.7]<≧1>	ON/ON (N/D) [≧1]<≧1>	ON/ON (N/D) [≧1]<≧1>	ON/ON (N/D) [0.7]<0.8>	ON/ON (N/D) [≧1]<≧1>	ON/ON (N/D) [0.9]<≧1>	ON/ON (N/D) [0.5]<0.8>	N/D
Cell No.23	Cell No.7	OFF/OFF [0.2]<0.2>	OFF/OFF (N/D) [0]<0>	OFF/ON (N/D) [0]<≧1>	OFF/ON (N/D) [0]<≧1>	OFF/ON (N/D) [0]<≧1>	OFF/ON (N/D) [0]<0.9>	OFF/ON (N/D) [0]<0.9>	frame out
Cell No.24	Cell No.8	OFF/ON [0.2]<0.7>	OFF/ON (N/D) [0.1]<0.5>	OFF/ON (N/D) [0]<0.7>	OFF/ON (N/D) [0]<0.5>	OFF/ON (N/D) [0.2]<0.6>	OFF/ON (N/D) [0.2]<0.6>	OFF/ON (N/D) [0.2]<≧1>	frame out
Cell No.25	Cell No.9	ON/ON [0.9]<0.5>	ON/OFF (Cell No.50) [0.9]<0.2>	ON/ON (N/D) [0.6]<0.5>	ON/ON (N/D) [0.6]<0.7>	ON/OFF (N/D) [0.5]<0.2>	ON/ON (N/D) [0.6]<0.6>	ON/OFF (N/D) [0.5]<0.3>	ON/ON (N/D) [0.4]<0.7>	ON/ON (N/D) [0.7]<≧1>	ON/ON (N/D) [0.5]<0.4>	frame out
Cell No.26	Cell No.10	ON/ON [0.5]<0.6>	ON/ON (N/D) [0.5]<0.7>	ON/ON (N/D) [≧1]<0.7>	ON/ON (N/D) [0.9]<0.5>	ON/ON (N/D) [0.8]<0.4>	ON/OFF (N/D) [0.8]<0.2>	ON/OFF (N/D) [≧1]<0.3>	ON/OFF (N/D) [≧1]<0>	ON/ON (N/D) [≧1]<0.7>	frame out
Cell No.27	Cell No.11	ON/ON [≧1]<0.9>	OFF/ON (N/D) [0.2]<0.6>	ON/ON (N/D) [≧1]<≧1>	ON/ON (N/D) [≧1]<0.7>	ON/ON (N/D) [≧1]<≧1>	ON/ON (N/D) [0.9]<0.8>	ON/ON (N/D) [0.8]<0.8>	ON/ON (N/D) [0.8]<0.7>	frame out
Cell No.28	Cell No.12	ON/ON [≧1]<0.9>	ON/ON (N/D) [≧1]<≧1>	ON/ON (N/D) [≧1]<≧1>	ON/ON (N/D) [0.6]<0.8>	ON/ON (N/D) [0.4]<0.8>	ON/ON (N/D) [0.4]<0.5>	ON/OFF (N/D) [0.5]<0.3>	OFF/OFF (N/D) [0.3]<0>	frame out
Cell No.29	Cell No.13	ON/OFF [≧1]<0.3>	ON/ON (N/D) [0.8]<0.5>	OFF/OFF (N/D) [0.3]<0.2>	ON/ON (N/D) [0.4]<0.7>	OFF/OFF (N/D) [0.3]<0.2>	ON/ON (N/D) [≧1]<≧1>	ON/ON (N/D) [≧1]<0.8>	frame out
Cell No.30	Cell No.14	ON/ON [0.7]<≧1>	OFF/ON (N/D) [0.2]<≧1>	OFF/ON (N/D) [0.2]<≧1>	ON/ON (N/D) [0.4]<0.9>	OFF/ON (N/D) [0.2]<0.4>	ON/ON (N/D) [0.8]<≧1>	ON/ON (N/D) [0.6]<≧1>	frame out
Cell No.31	Cell No.1	ON/ON [0.5]<0.4>	ON/ON (N/D) [0.6]<0.9>	ON/ON (N/D) [0.6]<≧1>	OFF/ON (N/D) [0.1]<0.9>	ON/ON (N/D) [0.5]<≧1>	OFF/ON (N/D) [0.3]<0.8>	OFF/ON (N/D) [0.3]<≧1>	OFF/ON (N/D) [0.2]<0.8>	N/D
Cell No.32	Cell No.2	ON/ON [≧1]<≧1>	OFF/ON (N/D) [0.3]<0.5>	OFF/OFF (N/D) [0]<0>	OFF/OFF (N/D) [0]<0.3>	ON/ON (N/D) [0.4]<≧1>	OFF/ON (N/D) [0]<0.4>	OFF/ON (N/D) [0]<0.9>	OFF/ON (N/D) [0]<0.6>	frame out
Cell No.33	Cell No.4	ON/ON [≧1]<0.6>	ON/ON (N/D) [≧1]<0.6>	ON/ON (N/D) [≧1]<≧1>	ON/ON (N/D) [≧1]<≧1>	ON/ON (N/D) [≧1]<≧1>	ON/ON (N/D) [0.7]<≧1>	OFF/ON (N/D) [0.3]<≧1>	ON/ON (N/D) [0.6]<≧1>	ON/ON (N/D) [≧1]<≧1>	ON/ON (N/D) [≧1]<0.5>	N/D
Cell No.34	Cell No.5	ON/ON [≧1]<≧1>	ON/ON (N/D) [≧1]<≧1>	ON/ON (N/D) [≧1]<≧1>	ON/ON (N/D) [≧1]<≧1>	ON/ON (N/D) [0.7]<≧1>	ON/ON (N/D) [0.4]<0.7>	ON/ON (N/D) [0.6]<≧1>	ON/ON (N/D) [0.4]<0.8>	ON/ON (N/D) [0.7]<0.9>	ON/ON (N/D) [0.6]<0.7>	N/D
Cell No.35	Cell No.6	ON/ON [0.8]<≧1>	ON/ON (N/D) [0.9]<≧1>	ON/ON (N/D) [0.7]<≧1>	ON/ON (N/D) [0.4]<≧1>	OFF/ON (N/D) [0]<≧1>	OFF/ON (N/D) [0.1]<0.5>	ON/OFF (N/D) [0.4]<0.3>	ON/ON (N/D) [0.9]<0.6>	ON/ON (N/D) [0.9]<≧1>	frame out
Cell No.36	Cell No.8	ON/ON [0.4]<0.4>	ON/ON (N/D) [0.4]<0.5>	ON/ON (N/D) [0.6]<0.4>	ON/ON (N/D) [0.7]<0.6>	ON/ON (N/D) [0.6]<0.7>	ON/ON (N/D) [0.6]<≧1>	ON/ON (N/D) [0.5]<≧1>	ON/ON (N/D) [0.9]<≧1>	ON/ON (N/D) [0.7]<0.6>	N/D
Cell No.37	Cell No.9	ON/OFF [0.9]<0.3>	ON/OFF (N/D) [0.7]<0>	ON/OFF (N/D) [0.5]<0>	ON/ON (N/D) [0.9]<0.6>	ON/ON (N/D) [0.8]<0.5>	ON/ON (N/D) [0.6]<0.6>	ON/OFF (N/D) [0.9]<0.1>	frame out
Cell No.38	Cell No.21	ON/ON [≧1]<≧1>	ON/ON (N/D) [≧1]<≧1>	ON/ON (N/D) [0.8]<≧1>	OFF/ON (N/D) [0.3]<≧1>	ON/ON (N/D) [0.6]<0.9>	ON/ON (N/D) [≧1]<0.8>	frame out
Cell No.39	Cell No.15	OFF/OFF [0.1]<0.3>	OFF/ON (N/D) [0.1]<0.5>	ON/ON (N/D) [≧1]<0.7>	ON/ON (N/D) [0.9]<0.5>	ON/ON (N/D) [0.8]<≧1>	ON/ON (N/D) [0.4]<≧1>	ON/ON (N/D) [≧1]<0.5>	frame out
Cell No.40	Cell No.14	ON/ON [0.6]<0.7>	ON/ON (N/D) [0.6]<0.6>	ON/ON (N/D) [0.7]<0.8>	OFF/ON (N/D) [0.3]<0.5>	OFF/ON (N/D) [0.2]<≧1>	OFF/ON (N/D) [0.1]<0.9>	frame out
Cell No.41	Cell No.18	OFF/ON [0]<≧1>	OFF/ON (N/D) [0]<0.9>	OFF/ON (N/D) [0.2]<≧1>	OFF/ON (N/D) [0]<0.7>	OFF/ON (N/D) [0.1]<≧1>	OFF/ON (N/D) [0.1]<≧1>	ON/ON (N/D) [≧1]<≧1>	ON/ON (N/D) [≧1]<≧1>	frame out
Cell No.42	Cell No.19	ON/ON [≧1]<≧1>	ON/ON (N/D) [≧1]<0.7>	ON/ON (N/D) [0.5]<0.7>	ON/ON (N/D) [0.4]<≧1>	ON/ON (N/D) [0.5]<0.7>	ON/ON (N/D) [0.4]<0.6>	OFF/ON (N/D) [0.2]<0.6>	OFF/ON (N/D) [0]<0.5>	N/D
Cell No.43	Cell No.20	OFF/ON [0.1]<≧1>	ON/ON (N/D) [0.5]<0.5>	ON/ON (N/D) [0.9]<0.7>	ON/ON (N/D) [0.8]<0.5>	ON/ON (N/D) [0.8]<0.6>	ON/ON (N/D) [≧1]<0.5>	ON/ON (N/D) [≧1]<≧1>	ON/ON (N/D) [0.6]<≧1>	frame out
Cell No.44	Cell No.2	ON/ON [0.7]<0.8>	ON/ON (N/D) [0.4]<0.5>	OFF/ON (N/D) [0.1]<0.8>	OFF/ON (N/D) [0]<0.5>	OFF/ON (N/D) [0]<0.8>	OFF/ON (N/D) [0.1]<0.6>	ON/ON (N/D) [0.4]<0.8>	ON/ON (N/D) [0.8]<0.7>	N/D
Cell No.45	Cell No.3	OFF/ON [0]<≧1>	OFF/ON (N/D) [0.1]<≧1>	OFF/ON (N/D) [0]<0.4>	OFF/ON (N/D) [0]<≧1>	OFF/ON (N/D) [0]<≧1>	OFF/ON (N/D) [0]<0.7>	OFF/ON (N/D) [0]<≧1>	OFF/ON (N/D) [0]<≧1>	OFF/ON (N/D) [0]<0.9>	N/D
Cell No.46	Cell No.4	ON/ON [≧1]<≧1>	ON/ON (N/D) [≧1]<0.9>	ON/ON (N/D) [≧1]<≧1>	ON/ON (N/D) [0.5]<≧1>	OFF/ON (N/D) [0.2]<≧1>	OFF/ON (N/D) [0.1]<0.6>	OFF/ON (N/D) [0.1]<≧1>	OFF/ON (N/D) [0]<≧1>	OFF/ON (N/D) [0]<0.4>	N/D
Cell No.47	Cell No.7	OFF/ON [0]<≧1>	OFF/ON (N/D) [0]<≧1>	OFF/ON (N/D) [0]<0.8>	OFF/ON (N/D) [0]<≧1>	OFF/ON (N/D) [0]<0.8>	OFF/ON (N/D) [0.2]<0.7>	ON/ON (N/D) [0.5]<≧1>	ON/ON (N/D) [0.7]<≧1>	frame out
Cell No.48	Cell No.16	ON/ON [0.7]<≧1>	OFF/ON (N/D) [0.1]<≧1>	OFF/ON (N/D) [0]<≧1>	OFF/ON (N/D) [0]<≧1>	OFF/ON (N/D) [0]<0.9>	OFF/ON (N/D) [0.1]<0.8>	ON/ON (N/D) [≧1]<≧1>	frame out
Cell No.49	Cell No.22	ON/ON [0.6]<0.9>	ON/ON (N/D) [0.7]<≧1>	ON/ON (N/D) [0.4]<≧1>	OFF/ON (N/D) [0.1]<≧1>	OFF/ON (N/D) [0]<0.9>	OFF/ON (N/D) [0]<0.9>	OFF/ON (N/D) [0]<≧1>	OFF/ON (N/D) [0.1]<0.9>	frame out
Cell No.50	Cell No.25	ON/OFF [0.9]<0.3>	ON/OFF (N/D) [0.8]<0>	ON/OFF (N/D) [0.6]<0>	OFF/OFF (N/D) [0.3]<0>	ON/OFF (N/D) [≧1]<0>	ON/OFF (N/D) [0.7]<0>	frame out
(B) HMR-left PEV/HMR-right PEV/Euchromatin
Original	Parent	Division time 0	Division time 1	Division time 2	Division time 3	Division time 4	Division time 5	Division time 6	Division time 7	Division time 8	Division time 9	Division time 10	Division time 11	Division time 12	Division time 13	Division time 14	Division time 15	Division time 16	Division time 17
Cell Number	Number	(daughter Number)	(daughter Number)	(daughter Number)	(daughter Number)	(daughter Number)	(daughter Number)	(daughter Number)	(daughter Number)	(daughter Number)	(daughter Number)	(daughter Number)	(daughter Number)	(daughter Number)	(daughter Number)	(daughter Number)	(daughter Number)	(daughter Number)	(daughter Number)
		[ECFP/mcherry]	[ECFP/mcherry]	[ECFP/mcherry]	[ECFP/mcherry]	[ECFP/mcherry]	[ECFP/mcherry]	[ECFP/mcherry]	[ECFP/mcherry]	[ECFP/mcherry]	[ECFP/mcherry]	[ECFP/mcherry]	[ECFP/mcherry]	[ECFP/mcherry]	[ECFP/mcherry]	[ECFP/mcherry]	[ECFP/mcherry]	[ECFP/mcherry]	[ECFP/mcherry]
		<EYFP/mcherry>	<EYFP/mcherry>	<EYFP/mcherry>	<EYFP/mcherry>	<EYFP/mcherry>	<EYFP/mcherry>	<EYFP/mcherry>	<EYFP/mcherry>	<EYFP/mcherry>	<EYFP/mcherry>	<EYFP/mcherry>	<EYFP/mcherry>	<EYFP/mcherry>	<EYFP/mcherry>	<EYFP/mcherry>	<EYFP/mcherry>	<EYFP/mcherry>	<EYFP/mcherry>
Cell No.1		ON/ON [≧1]<≧1>	ON/ON (Cell No.2) [≧1]<≧1>	ON/ON (Cell No.3) [≧1]<≧1>	ON/ON (Cell No.5) [≧1]<0.9>	OFF/ON (N/D) [0.3]<≧1>	OFF/ON (Cell No.8) [0]<0.6>	ON/ON (N/D) [0.7]<≧1>	ON/ON (Cell No.25) [≧1]<≧1>	ON/ON (Cell No.50) [≧1]<≧1>	ON/ON (N/D) [≧1]<0.7>	ON/ON (N/D) [≧1]<0.7>	ON/ON (N/D) [≧1]<0.9>	ON/ON (N/D) [≧1]<≧1>	ON/ON (N/D) [0.5]<≧1>	OFF/ON (N/D) [0.3]<0.7>	ON/ON (N/D) [≧1]<0.7>	ON/ON (N/D) [0.7]<0.6>	N/D
Cell No.2	Cell No.1	ON/ON [≧1]<≧1>	ON/ON (Cell No.4) [≧1]<0.4>	OFF/ON (N/D) [0]<≧1>	OFF/ON (N/D) [0]<0.7>	OFF/ON (Cell No.13) [0]<0.4>	OFF/ON (Cell No.26) [0]<0.4>	ON/ON (Cell No.47) [≧1]<≧1>	ON/ON (N/D) [0.7]<0.6>	ON/ON (N/D) [0.5]<0.6>	OFF/ON (N/D) [0.3]<0.4>	ON/ON (N/D) [0.5]<0.7>	ON/ON (N/D) [0.8]<≧1>	OFF/ON (N/D) [0.2]<0.5>	ON/ON (N/D) [≧1]<≧1>	ON/ON (N/D) [≧1]<≧1>	ON/ON (N/D) [≧1]<0.7>	ON/ON (N/D) [0.6]<0.5>	N/D
Cell No.3	Cell No.1	ON/ON [0.6]<0.7>	ON/ON (Cell No.6) [≧1]<≧1>	ON/ON (Cell No.9) [0.6]<0.8>	ON/ON (Cell No.10) [≧1]<0.4>	OFF/ON (Cell No.18) [0.2]<≧1>	OFF/ON (Cell No.37) [0.2]<0.8>	OFF/ON (N/D) [0.2]<≧1>	ON/ON (N/D) [≧1]<0.7>	OFF/ON (N/D) [0.2]<0.4>	ON/ON (N/D) [≧1]<≧1>	ON/ON (N/D) [0.5]<0.7>	ON/ON (N/D) [0.5]<0.6>	ON/ON (N/D) [≧1]<0.8>	ON/ON (N/D) [0.5]<0.6>	ON/ON (N/D) [0.6]<0.6>	ON/ON (N/D) [≧1]<0.7>	N/D
Cell No.4	Cell No.2	ON/ON [0.9]<≧1>	ON/ON (Cell No.11) [≧1]<≧1>	ON/ON (Cell No.14) [0.5]<0.7>	ON/ON (Cell No.19) [≧1]<≧1>	ON/ON (Cell No.38) [0.8]<≧1>	ON/ON (N/D) [≧1]<≧1>	ON/ON (N/D) [≧1]<0.7>	ON/ON (N/D) [0.5]<0.8>	OFF/ON (N/D) [0.3]<0.8>	frame out
Cell No.5	Cell No.1	ON/ON [≧1]<≧1>	ON/ON (Cell No.7) [≧1]<≧1>	ON/ON (N/D) [≧1]<≧1>	ON/ON (Cell No.20) [≧1]<≧1>	ON/ON (Cell No.27) [0.7]<0.7>	ON/ON (N/D) [0.4]<0.5>	ON/ON (N/D) [0.5]<≧1>	OFF/ON (N/D) [0.1]<0.9>	ON/ON (N/D) [≧1]<≧1>	ON/ON (N/D) [0.4]<0.8>	ON/ON (N/D) [0.7]<≧1>	ON/ON (N/D) [0.8]<≧1>	frame out
Cell No.6	Cell No.3	ON/ON [≧1]<≧1>	ON/ON (Cell No.12) [0.5]<0.8>	ON/ON (Cell No.16) [≧1]<≧1>	ON/ON (N/D) [≧1]<≧1>	ON/ON (Cell No.39) [0.9]<0.8>	ON/OFF (N/D) [≧1]<0.3>	ON/OFF (N/D) [0.9]<0>	ON/OFF (N/D) [0.9]<0.3>	ON/ON (N/D) [≧1]<0.7>	ON/ON (N/D) [0.9]<≧1>	ON/ON (N/D) [0.5]<≧1>	ON/ON (N/D) [≧1]<≧1>	ON/ON (N/D) [≧1]<≧1>	frame out
Cell No.7	Cell No.5	ON/ON [≧1]<≧1>	ON/ON (Cell No.15) [≧1]<≧1>	ON/ON (Cell No.21) [≧1]<≧1>	OFF/ON (Cell No.46) [0.2]<≧1>	ON/ON (Cell No.48) [≧1]<0.5>	ON/OFF (N/D) [0.5]<0>	OFF/OFF (N/D) [0.1]<0>	ON/OFF (N/D) [0.8]<0.2>	ON/OFF (N/D) [0.5]<0.1>	ON/ON (N/D) [0.5]<0.7>	ON/ON (N/D) [0.8]<0.6>	OFF/ON (N/D) [0.1]<0.7>	ON/ON (N/D) [0.4]<0.9>	ON/ON (N/D) [0.4]<0.8>	N/D
Cell No.8	Cell No.1	ON/ON [≧1]<0.9>	ON/ON (Cell No.22) [≧1]<≧1>	OFF/ON (Cell No.28) [0.3]<≧1>	ON/ON (N/D) [0.5]<0.6>	OFF/OFF (N/D) [0]<0.1>	OFF/OFF (N/D) [0]<0.2>	OFF/OFF (N/D) [0.2]<0.2>	OFF/OFF (N/D) [0]<0>	ON/OFF (N/D) [0.4]<0.3>	ON/ON (N/D) [0.5]<0.6>	ON/OFF (N/D) [0.7]<0.2>	frame out
Cell No.9	Cell No.3	ON/ON [0.6]<0.7>	ON/ON (Cell No.17) [≧1]<≧1>	ON/ON (Cell No.29) [0.4]<≧1>	ON/ON (Cell No.40) [0.9]<≧1>	ON/ON (N/D) [0.6]<0.9>	ON/ON (N/D) [≧1]<≧1>	ON/ON (N/D) [0.9]<≧1>	ON/ON (N/D) [0.4]<0.8>	OFF/ON (N/D) [0.2]<0.8>	OFF/ON (N/D) [0.1]<0.9>	ON/ON (N/D) [0.4]<0.6>	OFF/ON (N/D) [0.1]<0.7>	ON/OFF (N/D) [0.7]<0.3>	frame out
Cell No.10	Cell No.3	ON/ON [≧1]<0.7>	ON/ON (Cell No.30) [0.7]<0.5>	ON/ON (Cell No.49) [0.8]<0.5>	ON/OFF (N/D) [≧1]<0.3>	OFF/ON (N/D) [0]<0.4>	OFF/ON (N/D) [0.2]<0.4>	OFF/ON (N/D) [0]<0.5>	ON/ON (N/D) [≧1]<≧1>	ON/ON (N/D) [0.7]<≧1>	ON/ON (N/D) [0.7]<0.5>	ON/ON (N/D) [0.8]<≧1>	OFF/OFF (N/D) [0]<0>	frame out
Cell No.11	Cell No.4	ON/ON [≧1]<0.8>	ON/ON (Cell No.23) [≧1]<0.9>	ON/ON (Cell No.31) [≧1]<≧1>	ON/ON (N/D) [≧1]<0.7>	ON/ON (N/D) [≧1]<0.9>	ON/ON (N/D) [≧1]<0.6>	ON/ON (N/D) [0.4]<0.6>	OFF/ON (N/D) [0.3]<0.6>	OFF/ON (N/D) [0.2]<0.5>	frame out
Cell No.12	Cell No.6	ON/ON [≧1]<≧1>	ON/ON (Cell No.24) [0.8]<≧1>	ON/ON (Cell No.32) [0.4]<≧1>	ON/ON (N/D) [≧1]<≧1>	ON/ON (N/D) [≧1]<≧1>	ON/ON (N/D) [0.6]<≧1>	ON/ON (N/D) [≧1]<≧1>	OFF/ON (N/D) [0.3]<0.7>	OFF/OFF (N/D) [0.1]<0.3>	ON/ON (N/D) [≧1]<≧1>	ON/ON (N/D) [≧1]<0.7>	frame out
Cell No.13	Cell No.2	OFF/ON [0]<0.5>	OFF/ON (Cell No.33) [0]<0.4>	OFF/ON (N/D) [0]<0.4>	OFF/ON (N/D) [0]<0.9>	OFF/ON (N/D) [0]<0.7>	OFF/ON (N/D) [0.2]<0.9>	OFF/ON (N/D) [0]<0.4>	ON/ON (N/D) [0.7]<0.9>	ON/ON (N/D) [≧1]<≧1>	frame out
Cell No.14	Cell No.4	ON/ON [0.7]<0.8>	ON/ON (Cell No.34) [0.6]<0.7>	ON/ON (N/D) [≧1]<≧1>	ON/ON (N/D) [≧1]<0.4>	ON/OFF (N/D) [0.6]<0.3>	ON/OFF (N/D) [≧1]<0>	ON/OFF (N/D) [0.4]<0>	frame out
Cell No.15	Cell No.7	ON/ON [0.8]<≧1>	OFF/ON (Cell No.35) [0]<0.7>	OFF/ON (N/D) [0]<0.6>	OFF/ON (N/D) [0]<0.9>	OFF/ON (N/D) [0.1]<0.7>	ON/ON (N/D) [0.4]<≧1>	OFF/ON (N/D) [0.3]<≧1>	ON/ON (N/D) [0.8]<≧1>	ON/ON (N/D) [≧1]<≧1>	ON/ON (N/D) [≧1]<0.8>	ON/ON (N/D) [0.6]<0.8>	ON/ON (N/D) [0.8]<0.4>	N/D
Cell No.16	Cell No.6	ON/ON [0.8]<0.7>	ON/ON (Cell No.36) [0.4]<0.4>	ON/ON (N/D) [≧1]<0.8>	ON/ON (N/D) [0.4]<0.6>	OFF/ON (N/D) [0.3]<0.5>	ON/ON (N/D) [0.6]<0.7>	ON/ON (N/D) [0.9]<≧1>	ON/ON (N/D) [0.5]<0.8>	ON/ON (N/D) [≧1]<≧1>	ON/ON (N/D) [0.8]<0.9>	ON/ON (N/D) [≧1]<≧1>	ON/ON (N/D) [≧1]<≧1>	death
Cell No.17	Cell No.9	ON/ON [0.7]<0.9>	ON/ON (Cell No.41) [≧1]<≧1>	OFF/ON (N/D) [0.3]<0.5>	OFF/OFF (N/D) [0.1]<0.3>	ON/ON (N/D) [0.4]<0.4>	ON/ON (N/D) [0.5]<≧1>	OFF/ON (N/D) [0.1]<≧1>	OFF/ON (N/D) [0.1]<≧1>	OFF/ON (N/D) [0.3]<0.9>	OFF/OFF (N/D) [0.2]<0.1>	frame out
Cell No.18	Cell No.3	ON/ON [≧1]<0.9>	OFF/ON (Cell No.42) [0.2]<0.7>	OFF/OFF (N/D) [0.3]<0.3>	OFF/OFF (N/D) [0]<0>	OFF/OFF (N/D) [0.3]<0>	OFF/OFF (N/D) [0.2]<0.1>	OFF/OFF (N/D) [0.3]<0.3>	ON/ON (N/D) [0.6]<0.4>	ON/ON (N/D) [≧1]<0.7>	ON/ON (N/D) [≧1]<≧1>	ON/ON (N/D) [≧1]<0.6>	N/D
Cell No.19	Cell No.4	OFF/ON [0.2]<≧1>	OFF/ON (Cell No.43) [0.1]<0.5>	OFF/ON (N/D) [0]<0.5>	ON/ON (N/D) [0.4]<0.5>	ON/ON (N/D) [0.5]<≧1>	OFF/ON (N/D) [0.2]<0.7>	frame out
Cell No.20	Cell No.5	ON/ON [≧1]<≧1>	OFF/ON (N/D) [0.3]<≧1>	ON/ON (N/D) [≧1]<≧1>	OFF/ON (N/D) [0.2]<≧1>	OFF/ON (N/D) [0.2]<≧1>	OFF/ON (N/D) [0]<0.6>	ON/ON (N/D) [0.5]<≧1>	OFF/ON (N/D) [0]<0.8>	frame out
Cell No.21	Cell No.7	ON/ON [≧1]<≧1>	ON/ON (N/D) [≧1]<0.9>	ON/ON (N/D) [≧1]<0.9>	OFF/ON (N/D) [0.3]<0.5>	OFF/OFF (N/D) [0.3]<0.2>	OFF/OFF (N/D) [0.2]<0.2>	OFF/OFF (N/D) [0.2]<0.2>	ON/OFF (N/D) [0.7]<0.3>	ON/OFF (N/D) [0.5]<0.3>	OFF/ON (N/D) [0.2]<0.6>	N/D
Cell No.22	Cell No.8	ON/ON [0.4]<≧1>	ON/ON (N/D) [0.8]<0.8>	ON/ON (N/D) [0.9]<0.7>	ON/ON (N/D) [≧1]<0.6>	ON/ON (N/D) [≧1]<0.7>	ON/ON (N/D) [0.6]<0.6>	ON/ON (N/D) [≧1]<≧1>	ON/ON (N/D) [0.8]<0.6>	frame out
Cell No.23	Cell No.11	ON/ON [≧1]<≧1>	ON/ON (Cell No.44) [≧1]<≧1>	ON/ON (N/D) [≧1]<0.7>	ON/ON (N/D) [0.4]<0.7>	ON/ON (N/D) [0.4]<0.7>	ON/ON (N/D) [0.8]<0.8>	ON/ON (N/D) [0.7]<0.5>	OFF/OFF (N/D) [0.3]<0.1>	OFF/OFF (N/D) [0]<0>	frame out
Cell No.24	Cell No.12	ON/ON [0.8]<0.8>	ON/ON (N/D) [≧1]<≧1>	ON/ON (N/D) [≧1]<≧1>	ON/ON (N/D) [≧1]<≧1>	ON/ON (N/D) [0.8]<0.9>	ON/ON (N/D) [≧1]<≧1>	ON/ON (N/D) [≧1]<0.8>	ON/ON (N/D) [≧1]<≧1>	frame out
Cell No.25	Cell No.1	ON/ON [≧1]<≧1>	ON/ON (N/D) [≧1]<≧1>	ON/ON (N/D) [≧1]<≧1>	ON/ON (N/D) [0.8]<≧1>	ON/ON (N/D) [≧1]<≧1>	ON/ON (N/D) [0.7]<≧1>	ON/ON (N/D) [≧1]<≧1>	ON/ON (N/D) [≧1]<≧1>	ON/ON (N/D) [0.7]<≧1>	frame out
Cell No.26	Cell No.2	OFF/ON [0]<0.5>	ON/ON (Cell No.45) [0.4]<0.7>	OFF/ON (N/D) [0.3]<0.5>	ON/OFF (N/D) [0.4]<0.3>	ON/ON (N/D) [0.6]<≧1>	ON/ON (N/D) [0.5]<0.9>	ON/ON (N/D) [0.4]<0.4>	ON/ON (N/D) [0.5]<0.4>	ON/OFF (N/D) [0.6]<0.3>	ON/OFF (N/D) [0.5]<0.2>	OFF/OFF (N/D) [0.2]<0.2>	frame out
Cell No.27	Cell No.5	ON/ON [0.7]<0.4>	ON/ON (N/D) [0.7]<0.5>	ON/OFF (N/D) [≧1]<0>	OFF/OFF (N/D) [0.2]<0.3>	OFF/ON (N/D) [0.2]<0.6>	ON/ON (N/D) [0.4]<0.8>	OFF/ON (N/D) [0]<0.7>	frame out
Cell No.28	Cell No.8	ON/ON [0.6]<≧1>	ON/ON (N/D) [≧1]<0.7>	OFF/ON (N/D) [0.3]<0.7>	ON/ON (N/D) [0.7]<0.6>	ON/ON (N/D) [0.5]<0.6>	ON/OFF (N/D) [0.7]<0.3>	OFF/OFF (N/D) [0.3]<0.2>	ON/ON (N/D) [0.4]<0.5>	ON/ON (N/D) [0.4]<0.7>	ON/ON (N/D) [0.4]<0.8>	N/D
Cell No.29	Cell No.9	ON/ON [0.5]<0.7>	OFF/ON (N/D) [0.3]<0.9>	ON/ON (N/D) [0.6]<0.5>	ON/ON (N/D) [0.8]<0.8>	ON/ON (N/D) [0.6]<0.7>	OFF/ON (N/D) [0.2]<0.4>	ON/ON (N/D) [0.7]<0.7>	ON/ON (N/D) [0.9]<≧1>	ON/ON (N/D) [≧1]<≧1>	frame out
Cell No.30	Cell No.10	ON/ON [0.4]<0.6>	ON/ON (N/D) [≧1]<0.5>	ON/ON (N/D) [0.5]<0.6>	ON/ON (N/D) [≧1]<0.9>	ON/ON (N/D) [≧1]<≧1>	ON/ON (N/D) [≧1]<≧1>	ON/ON (N/D) [≧1]<≧1>	ON/ON (N/D) [≧1]<≧1>	ON/ON (N/D) [0.9]<0.4>	ON/OFF (N/D) [0.7]<0>	OFF/OFF (N/D) [0]<0>	frame out
Cell No.31	Cell No.11	ON/ON [≧1]<≧1>	ON/ON (N/D) [≧1]<≧1>	ON/ON (N/D) [0.6]<0.9>	ON/ON (N/D) [0.5]<0.8>	OFF/ON (N/D) [0]<0.4>	OFF/ON (N/D) [0]<0.9>	frame out
Cell No.32	Cell No.12	ON/ON [0.8]<0.8>	ON/ON (N/D) [0.9]<0.6>	OFF/ON (N/D) [0.2]<0.4>	ON/ON (N/D) [≧1]<0.4>	ON/ON (N/D) [0.8]<0.4>	ON/ON (N/D) [0.9]<0.4>	ON/ON (N/D) [0.8]<≧1>	ON/ON (N/D) [≧1]<≧1>	OFF/ON (N/D) [0.1]<0.7>	OFF/ON (N/D) [0]<0.4>	frame out
Cell No.33	Cell No.13	OFF/OFF [0]<0.2>	OFF/OFF (N/D) [0.1]<0.2>	OFF/OFF (N/D) [0]<0.1>	OFF/OFF (N/D) [0]<0.2>	OFF/OFF (N/D) [0]<0.2>	OFF/OFF (N/D) [0]<0.2>	OFF/OFF (N/D) [0]<0.1>	frame out
Cell No.34	Cell No.14	OFF/ON [0.2]<0.5>	ON/ON (N/D) [≧1]<0.8>	ON/ON (N/D) [≧1]<0.4>	ON/ON (N/D) [≧1]<0.6>	ON/OFF (N/D) [0.9]<0.3>	ON/OFF (N/D) [0.6]<0.1>	frame out
Cell No.35	Cell No.15	OFF/ON [0.3]<0.7>	OFF/ON (N/D) [0.1]<≧1>	OFF/ON (N/D) [0]<0.4>	OFF/ON (N/D) [0]<0.4>	OFF/ON (N/D) [0.2]<0.5>	ON/OFF (N/D) [0.4]<0.3>	ON/ON (N/D) [0.9]<0.8>	ON/ON (N/D) [0.6]<0.9>	ON/ON (N/D) [≧1]<≧1>	ON/ON (N/D) [≧1]<≧1>	ON/ON (N/D) [0.5]<0.6>	N/D
Cell No.36	Cell No.16	ON/ON [0.5]<0.8>	ON/ON (N/D) [0.8]<≧1>	OFF/ON (N/D) [0.3]<0.9>	ON/ON (N/D) [0.9]<0.8>	ON/ON (N/D) [0.9]<≧1>	OFF/ON (N/D) [0.1]<0.4>	OFF/OFF (N/D) [0]<0.1>	OFF/OFF (N/D) [0]<0>	OFF/OFF (N/D) [0]<0>	frame out
Cell No.37	Cell No.3	OFF/ON [0.1]<≧1>	OFF/ON (N/D) [0.2]<≧1>	ON/ON (N/D) [≧1]<≧1>	ON/ON (N/D) [0.5]<0.8>	OFF/ON (N/D) [0]<0.4>	OFF/ON (N/D) [0.1]<0.4>	OFF/OFF (N/D) [0]<0.3>	OFF/ON (N/D) [0]<0.8>	OFF/ON (N/D) [0.1]<0.4>	OFF/ON (N/D) [0]<0.4>	N/D
Cell No.38	Cell No.4	ON/ON [0.4]<≧1>	ON/ON (N/D) [0.5]<≧1>	ON/ON (N/D) [0.6]<0.7>	ON/ON (N/D) [0.4]<0.7>	ON/ON (N/D) [≧1]<0.5>	frame out
Cell No.39	Cell No.6	ON/ON [≧1]<0.6>	ON/ON (N/D) [0.7]<0.4>	ON/ON (N/D) [0.4]<0.6>	OFF/ON (N/D) [0.1]<≧1>	OFF/ON (N/D) [0.1]<≧1>	ON/ON (N/D) [0.6]<0.8>	ON/ON (N/D) [0.6]<0.6>	frame out
Cell No.40	Cell No.9	OFF/ON [0.3]<0.6>	ON/OFF (N/D) [0.7]<0.1>	OFF/OFF (N/D) [0.2]<0.1>	OFF/OFF (N/D) [0.3]<0.3>	ON/ON (N/D) [0.8]<≧1>	ON/ON (N/D) [≧1]<≧1>	ON/ON (N/D) [0.9]<0.9>	ON/ON (N/D) [≧1]<≧1>	ON/ON (N/D) [0.9]<≧1>	ON/ON (N/D) [≧1]<≧1>	frame out
Cell No.41	Cell No.17	OFF/ON [0.3]<0.5>	OFF/ON (N/D) [0.2]<0.5>	OFF/ON (N/D) [0.1]<0.4>	OFF/ON (N/D) [0]<0.4>	ON/ON (N/D) [0.6]<0.8>	OFF/ON (N/D) [0.3]<0.5>	ON/ON (N/D) [≧1]<0.6>	ON/OFF (N/D) [0.8]<0.1>	frame out
Cell No.42	Cell No.18	ON/ON [0.3]<0.6>	ON/ON (N/D) [0.6]<0.8>	OFF/ON (N/D) [0.1]<0.7>	OFF/ON (N/D) [0]<0.5>	OFF/OFF (N/D) [0]<0.3>	ON/ON (N/D) [0.7]<0.5>	ON/ON (N/D) [≧1]<0.7>	ON/ON (N/D) [≧1]<0.9>	ON/ON (N/D) [≧1]<0.7>	ON/ON (N/D) [0.6]<0.4>	N/D
Cell No.43	Cell No.19	OFF/ON [0]<0.5>	OFF/ON (N/D) [0.1]<0.5>	OFF/ON (N/D) [0]<0.9>	OFF/ON (N/D) [0]<≧1>	OFF/ON (N/D) [0.2]<0.7>	frame out
Cell No.44	Cell No.23	ON/ON [≧1]<≧1>	ON/ON (N/D) [≧1]<≧1>	OFF/ON (N/D) [0]<≧1>	OFF/ON (N/D) [0]<0.9>	OFF/ON (N/D) [0]<0.4>	OFF/OFF (N/D) [0]<0.1>	OFF/OFF (N/D) [0]<0>	frame out
Cell No.45	Cell No.26	OFF/OFF [0]<0.2>	OFF/OFF (N/D) [0]<0>	OFF/OFF (N/D) [0]<0>	OFF/OFF (N/D) [0]<0>	OFF/OFF (N/D) [0.1]<0.2>	OFF/OFF (N/D) [0]<0.1>	ON/ON (N/D) [≧1]<0.4>	ON/ON (N/D) [≧1]<0.6>	ON/ON (N/D) [≧1]<≧1>	OFF/ON (N/D) [0]<0.7>	N/D
Cell No.46	Cell No.7	OFF/ON [0.3]<≧1>	ON/ON (N/D) [≧1]<≧1>	ON/ON (N/D) [0.4]<0.8>	OFF/ON (N/D) [0.1]<0.8>	OFF/ON (N/D) [0.1]<0.7>	ON/ON (N/D) [0.9]<≧1>	ON/ON (N/D) [0.9]<≧1>	ON/ON (N/D) [≧1]<≧1>	frame out
Cell No.47	Cell No.2	OFF/OFF [0]<0.3>	OFF/ON (N/D) [0]<0.4>	OFF/OFF (N/D) [0]<0.2>	OFF/OFF (N/D) [0]<0.2>	OFF/OFF (N/D) [0]<0.3>	OFF/OFF (N/D) [0.1]<0.2>	OFF/OFF (N/D) [0]<0>	frame out
Cell No.48	Cell No.7	ON/ON [≧1]<0.7>	ON/OFF (N/D) [0.6]<0.2>	ON/OFF (N/D) [0.4]<0.3>	ON/OFF (N/D) [0.4]<0.1>	ON/ON (N/D) [0.4]<0.5>	OFF/OFF (N/D) [0.2]<0.3>	OFF/ON (N/D) [0.3]<0.8>	ON/ON (N/D) [0.4]<0.4>	ON/OFF (N/D) [0.5]<0.3>	N/D
Cell No.49	Cell No.10	OFF/OFF [0.3]<0.3>	ON/OFF (N/D) [0.5]<0>	ON/OFF (N/D) [0.4]<0>	ON/OFF (N/D) [0.4]<0.2>	OFF/OFF (N/D) [0]<0.2>	OFF/OFF (N/D) [0.1]<0.3>	OFF/OFF (N/D) [0]<0.2>	ON/ON (N/D) [0.7]<0.8>	ON/ON (N/D) [≧1]<0.7>	ON/ON (N/D) [≧1]<0.7>	N/D
Cell No.50	Cell No.1	ON/ON [≧1]<≧1>	ON/ON (N/D) [0.6]<≧1>	OFF/ON (N/D) [0.3]<≧1>	OFF/ON (N/D) [0.2]<≧1>	ON/ON (N/D) [0.9]<≧1>	ON/ON (N/D) [0.6]<0.9>	ON/ON (N/D) [0.8]<0.9>	frame out
(C) HML-right PEV/HMR-left PEV/Euchromatin
Original	Parent	Division time 0	Division time 1	Division time 2	Division time 3	Division time 4	Division time 5	Division time 6	Division time 7	Division time 8	Division time 9	Division time 10	Division time 11	Division time 12	Division time 13	Division time 14	Division time 15	Division time 16
Cell Number	Number	(daughter Number)	(daughter Number)	(daughter Number)	(daughter Number)	(daughter Number)	(daughter Number)	(daughter Number)	(daughter Number)	(daughter Number)	(daughter Number)	(daughter Number)	(daughter Number)	(daughter Number)	(daughter Number)	(daughter Number)	(daughter Number)	(daughter Number)
		[EYFP/mcherry]	[EYFP/mcherry]	[EYFP/mcherry]	[EYFP/mcherry]	[EYFP/mcherry]	[EYFP/mcherry]	[EYFP/mcherry]	[EYFP/mcherry]	[EYFP/mcherry]	[EYFP/mcherry]	[EYFP/mcherry]	[EYFP/mcherry]	[EYFP/mcherry]	[EYFP/mcherry]	[EYFP/mcherry]	[EYFP/mcherry]	[EYFP/mcherry]
		<ECFP/mcherry>	<ECFP/mcherry>	<ECFP/mcherry>	<ECFP/mcherry>	<ECFP/mcherry>	<ECFP/mcherry>	<ECFP/mcherry>	<ECFP/mcherry>	<ECFP/mcherry>	<ECFP/mcherry>	<ECFP/mcherry>	<ECFP/mcherry>	<ECFP/mcherry>	<ECFP/mcherry>	<ECFP/mcherry>	<ECFP/mcherry>	<ECFP/mcherry>
Cell No.1		ON/ON [0.9]<≧1>	ON/ON (Cell No.2) [≧1]<0.9>	ON/ON (Cell No.3) [≧1]<0.8>	ON/ON (Cell No.4) [≧1]<0.8>	ON/ON (Cell No.7) [≧1]<0.4>	ON/ON (Cell No.12) [≧1]<0.4>	ON/ON (Cell No.22) [0.7]<0.7>	ON/ON (Cell No.31) [0.8]<0.5>	ON/OFF (Cell No.48) [0.5]<0.1>	ON/OFF (N/D) [0.5]<0>	ON/OFF (N/D) [≧1]<0.2>	ON/ON (N/D) [≧1]<0.6>	ON/ON (N/D) [≧1]<0.9>	ON/ON (N/D) [≧1]<0.4>	ON/OFF (N/D) [≧1]<0.2>	ON/OFF (N/D) [0.7]<0.2>	N/D
Cell No.2	Cell No.1	ON/ON [≧1]<≧1>	ON/ON (Cell No.5) [≧1]<0.9>	ON/ON (Cell No.8) [≧1]<0.4>	OFF/ON (Cell No.13) [0.2]<0.5>	OFF/ON (Cell No.24) [0.2]<0.4>	OFF/ON (Cell No.32) [0.2]<0.7>	ON/OFF (Cell No.49) [0.5]<0.3>	ON/ON (N/D) [0.5]<0.4>	ON/OFF (N/D) [0.5]<0.3>	ON/OFF (N/D) [0.6]<0.3>	ON/ON (N/D) [0.4]<0.5>	ON/ON (N/D) [0.8]<0.8>	ON/OFF (N/D) [0.7]<0.3>	OFF/OFF (N/D) [0.2]<0.3>	N/D
Cell No.3	Cell No.1	ON/ON [0.9]<0.6>	ON/ON (Cell No.6) [0.6]<0.7>	OFF/ON (Cell No.11) [0.3]<0.5>	ON/ON (Cell No.15) [0.5]<0.5>	ON/ON (Cell No.33) [0.7]<0.9>	ON/ON (Cell No.50) [0.7]<0.5>	ON/ON (N/D) [0.8]<≧1>	ON/ON (N/D) [≧1]<0.7>	ON/ON (N/D) [≧1]<0.5>	ON/ON (N/D) [≧1]<≧1>	ON/OFF (N/D) [≧1]<0>	ON/OFF (N/D) [≧1]<0.2>	ON/ON (N/D) [0.9]<≧1>	N/D
Cell No.4	Cell No.1	ON/ON [0.9]<0.4>	ON/ON (Cell No.9) [0.4]<0.4>	ON/ON (Cell No.16) [0.5]<0.4>	ON/OFF (Cell No.25) [0.8]<0.3>	OFF/ON (Cell No.34) [0.3]<0.4>	OFF/ON (N/D) [0.3]<≧1>	ON/ON (N/D) [0.9]<≧1>	ON/ON (N/D) [≧1]<0.7>	ON/ON (N/D) [0.6]<0.6>	ON/ON (N/D) [≧1]<≧1>	ON/ON (N/D) [≧1]<≧1>	ON/ON (N/D) [0.8]<≧1>	N/D
Cell No.5	Cell No.2	ON/ON [≧1]<≧1>	ON/ON (Cell No.10) [0.7]<≧1>	ON/ON (Cell No.17) [0.5]<0.5>	ON/ON (Cell No.35) [0.8]<≧1>	ON/ON (N/D) [≧1]<0.7>	ON/ON (N/D) [0.9]<0.5>	ON/ON (N/D) [≧1]<0.5>	ON/OFF (N/D) [≧1]<0.2>	ON/OFF (N/D) [≧1]<0>	ON/OFF (N/D) [≧1]<0>	ON/OFF (N/D) [≧1]<0.1>	OFF/OFF (N/D) [0.3]<0>	OFF/OFF (N/D) [0.2]<0>	frame out
Cell No.6	Cell No.3	ON/ON [0.8]<≧1>	ON/ON (Cell No.14) [≧1]<0.7>	ON/ON (Cell No.26) [≧1]<0.7>	ON/ON (Cell No.36) [≧1]<0.6>	ON/OFF (N/D) [0.8]<0.2>	ON/ON (N/D) [0.9]<0.9>	ON/ON (N/D) [0.7]<0.8>	OFF/ON (N/D) [0.3]<0.7>	OFF/ON (N/D) [0.3]<0.6>	OFF/OFF (N/D) [0.3]<0.3>	OFF/OFF (N/D) [0]<0>	OFF/OFF (N/D) [0.2]<0>	OFF/OFF (N/D) [0.3]<0>	N/D
Cell No.7	Cell No.1	ON/ON [≧1]<0.6>	ON/ON (Cell No.18) [≧1]<0.7>	ON/OFF (Cell No.27) [≧1]<0.3>	ON/OFF (Cell No.37) [≧1]<0>	ON/OFF (N/D) [0.7]<0>	ON/OFF (N/D) [0.7]<0>	ON/OFF (N/D) [0.8]<0.2>	ON/OFF (N/D) [0.8]<0.1>	ON/OFF (N/D) [0.6]<0.1>	OFF/OFF (N/D) [0.3]<0.1>	OFF/OFF (N/D) [0]<0>	OFF/OFF (N/D) [0.2]<0>	N/D
Cell No.8	Cell No.2	ON/ON [0.6]<0.4>	ON/OFF (Cell No.19) [0.9]<0.2>	ON/OFF (Cell No.38) [≧1]<0.2>	ON/OFF (N/D) [≧1]<0.3>	ON/ON (N/D) [≧1]<0.9>	ON/OFF (N/D) [0.5]<0.2>	ON/ON (N/D) [0.6]<0.5>	ON/ON (N/D) [≧1]<≧1>	ON/ON (N/D) [0.9]<0.8>	ON/OFF (N/D) [≧1]<0.2>	ON/OFF (N/D) [≧1]<0.2>	frame out
Cell No.9	Cell No.4	ON/OFF [0.5]<0.2>	ON/ON (Cell No.20) [0.5]<0.4>	ON/ON (Cell No.39) [≧1]<≧1>	ON/ON (N/D) [≧1]<≧1>	ON/ON (N/D) [0.9]<≧1>	ON/ON (N/D) [≧1]<≧1>	ON/ON (N/D) [≧1]<0.7>	ON/ON (N/D) [0.9]<0.4>	ON/ON (N/D) [≧1]<≧1>	ON/ON (N/D) [≧1]<≧1>	ON/OFF (N/D) [0.9]<0.3>	ON/OFF (N/D) [≧1]<0.2>	N/D
Cell No.10	Cell No.5	ON/ON [≧1]<0.6>	ON/ON (Cell No.23) [≧1]<≧1>	ON/ON (Cell No.40) [≧1]<≧1>	ON/ON (N/D) [≧1]<≧1>	ON/ON (N/D) [≧1]<0.7>	ON/OFF (N/D) [≧1]<0>	ON/OFF (N/D) [0.5]<0.1>	ON/OFF (N/D) [0.6]<0.1>	ON/OFF (N/D) [0.4]<0.3>	OFF/ON (N/D) [0.2]<0.5>	frame out
Cell No.11	Cell No.3	OFF/ON [0.3]<0.4>	OFF/OFF (Cell No.21) [0.3]<0.3>	OFF/OFF (Cell No.41) [0.3]<0.2>	ON/OFF (N/D) [0.9]<0.2>	ON/OFF (N/D) [0.8]<0.2>	ON/ON (N/D) [≧1]<0.5>	ON/ON (N/D) [0.9]<0.4>	ON/ON (N/D) [≧1]<≧1>	ON/ON (N/D) [≧1]<0.9>	ON/ON (N/D) [0.7]<≧1>	ON/ON (N/D) [0.6]<0.9>	ON/ON (N/D) [0.9]<≧1>	N/D
Cell No.12	Cell No.1	ON/ON [≧1]<0.4>	ON/OFF (Cell No.28) [0.7]<0.3>	ON/ON (Cell No.42) [≧1]<0.5>	ON/ON (N/D) [0.7]<0.4>	ON/ON (N/D) [0.6]<0.6>	ON/ON (N/D) [0.7]<0.4>	ON/ON (N/D) [≧1]<0.6>	ON/ON (N/D) [≧1]<≧1>	ON/ON (N/D) [≧1]<≧1>	ON/ON (N/D) [0.9]<0.7>	ON/ON (N/D) [0.6]<0.7>	death
Cell No.13	Cell No.2	OFF/ON [0.2]<0.5>	OFF/OFF (Cell No.29) [0.1]<0.3>	OFF/OFF (N/D) [0]<0.2>	OFF/ON (N/D) [0]<0.8>	OFF/ON (N/D) [0.1]<≧1>	OFF/ON (N/D) [0.1]<0.7>	OFF/ON (N/D) [0.1]<0.5>	OFF/OFF (N/D) [0]<0.2>	OFF/OFF (N/D) [0.2]<0>	OFF/OFF (N/D) [0.1]<0>	frame out
Cell No.14	Cell No.6	ON/ON [0.9]<≧1>	ON/ON (Cell No.30) [≧1]<≧1>	ON/ON (N/D) [≧1]<≧1>	ON/ON (N/D) [≧1]<≧1>	ON/ON (N/D) [≧1]<0.9>	ON/ON (N/D) [≧1]<≧1>	ON/ON (N/D) [≧1]<≧1>	ON/ON (N/D) [0.9]<≧1>	ON/ON (N/D) [≧1]<≧1>	ON/ON (N/D) [0.6]<0.6>	N/D
Cell No.15	Cell No.3	ON/ON [0.4]<0.5>	OFF/ON (Cell No.43) [0.2]<0.4>	OFF/OFF (N/D) [0.2]<0>	ON/OFF (N/D) [0.9]<0.2>	ON/OFF (N/D) [≧1]<0.3>	ON/OFF (N/D) [0.9]<0>	ON/OFF (N/D) [≧1]<0>	ON/OFF (N/D) [≧1]<0>	frame out
Cell No.16	Cell No.4	OFF/ON [0.2]<0.8>	OFF/OFF (Cell No.44) [0]<0.2>	OFF/OFF (N/D) [0]<0>	OFF/OFF (N/D) [0.3]<0>	OFF/OFF (N/D) [0.1]<0>	OFF/OFF (N/D) [0]<0>	ON/OFF (N/D) [0.7]<0>	ON/OFF (N/D) [0.9]<0>	ON/OFF (N/D) [0.7]<0>	frame out
Cell No.17	Cell No.5	ON/ON [0.8]<0.9>	ON/OFF (Cell No.45) [≧1]<0.3>	ON/OFF (N/D) [0.7]<0.3>	ON/ON (N/D) [≧1]<0.4>	ON/ON (N/D) [≧1]<0.5>	ON/OFF (N/D) [0.4]<0>	ON/OFF (N/D) [≧1]<0>	frame out
Cell No.18	Cell No.7	ON/ON [≧1]<≧1>	ON/ON (Cell No.46) [0.6]<0.8>	ON/ON (N/D) [0.4]<0.7>	OFF/OFF (N/D) [0.3]<0.1>	OFF/OFF (N/D) [0.2]<0.2>	OFF/OFF (N/D) [0]<0>	ON/OFF (N/D) [≧1]<0.3>	ON/OFF (N/D) [≧1]<0>	ON/ON (N/D) [≧1]<≧1>	ON/ON (N/D) [0.9]<0.4>	N/D
Cell No.19	Cell No.8	ON/OFF [0.7]<0.1>	ON/OFF (Cell No.47) [0.9]<0.1>	ON/OFF (N/D) [0.5]<0>	ON/OFF (N/D) [0.9]<0.3>	ON/OFF (N/D) [0.9]<0.1>	ON/OFF (N/D) [≧1]<0>	ON/OFF (N/D) [≧1]<0>	ON/ON (N/D) [≧1]<0.5>	frame out
Cell No.20	Cell No.9	ON/OFF [0.6]<0.1>	ON/OFF (N/D) [0.4]<0.3>	OFF/ON (N/D) [0.3]<0.5>	ON/OFF (N/D) [0.7]<0.3>	ON/OFF (N/D) [0.7]<0.2>	ON/ON (N/D) [≧1]<≧1>	ON/ON (N/D) [≧1]<≧1>	ON/ON (N/D) [≧1]<≧1>	ON/OFF (N/D) [0.6]<0.3>	N/D
Cell No.21	Cell No.11	OFF/OFF [0.1]<0.2>	OFF/OFF (N/D) [0.1]<0.3>	OFF/OFF (N/D) [0.1]<0.1>	OFF/OFF (N/D) [0.2]<0>	ON/OFF (N/D) [0.4]<0>	ON/OFF (N/D) [0.6]<0>	ON/OFF (N/D) [0.7]<0.1>	OFF/OFF (N/D) [0.2]<0.2>	OFF/OFF (N/D) [0]<0>	frame out
Cell No.22	Cell No.1	ON/ON [≧1]<≧1>	ON/ON (N/D) [0.7]<≧1>	ON/ON (N/D) [≧1]<≧1>	ON/ON (N/D) [≧1]<≧1>	ON/ON (N/D) [≧1]<≧1>	ON/ON (N/D) [0.5]<≧1>	ON/ON (N/D) [0.5]<≧1>	ON/ON (N/D) [0.5]<≧1>	ON/ON (N/D) [0.4]<0.9>	OFF/ON (N/D) [0.2]<0.4>	N/D
Cell No.23	Cell No.10	ON/ON [≧1]<≧1>	ON/ON (N/D) [≧1]<0.4>	ON/OFF (N/D) [≧1]<0.3>	ON/OFF (N/D) [≧1]<0.2>	ON/OFF (N/D) [≧1]<0.2>	ON/OFF (N/D) [≧1]<0>	ON/ON (N/D) [≧1]<≧1>	ON/ON (N/D) [0.8]<≧1>	frame out
Cell No.24	Cell No.2	ON/ON [0.7]<0.6>	ON/ON (N/D) [0.6]<0.5>	ON/ON (N/D) [≧1]<≧1>	ON/ON (N/D) [≧1]<0.9>	ON/ON (N/D) [≧1]<0.5>	ON/ON (N/D) [≧1]<0.8>	ON/ON (N/D) [≧1]<≧1>	ON/ON (N/D) [≧1]<≧1>	ON/ON (N/D) [≧1]<≧1>	ON/ON (N/D) [≧1]<0.5>	frame out
Cell No.25	Cell No.4	ON/ON [0.8]<0.5>	ON/ON (N/D) [0.8]<≧1>	ON/ON (N/D) [0.8]<≧1>	ON/ON (N/D) [0.8]<≧1>	ON/ON (N/D) [0.6]<0.8>	ON/ON (N/D) [0.4]<≧1>	OFF/ON (N/D) [0.1]<≧1>	OFF/ON (N/D) [0]<0.5>	OFF/ON (N/D) [0]<0.7>	N/D
Cell No.26	Cell No.6	ON/ON [0.8]<0.6>	ON/ON (N/D) [0.8]<0.6>	ON/ON (N/D) [0.8]<0.6>	ON/ON (N/D) [≧1]<0.5>	ON/OFF (N/D) [≧1]<0.2>	ON/OFF (N/D) [0.9]<0.1>	ON/OFF (N/D) [0.7]<0>	OFF/OFF (N/D) [0.3]<0>	ON/OFF (N/D) [0.4]<0.1>	N/D
Cell No.27	Cell No.7	ON/OFF [0.8]<0>	ON/OFF (N/D) [0.5]<0>	ON/OFF (N/D) [0.5]<0>	ON/OFF (N/D) [0.7]<0>	ON/OFF (N/D) [0.8]<0>	ON/OFF (N/D) [≧1]<0>	ON/OFF (N/D) [≧1]<0>	ON/OFF (N/D) [≧1]<0>	frame out
Cell No.28	Cell No.12	ON/ON [≧1]<≧1>	ON/ON (N/D) [≧1]<0.5>	ON/OFF (N/D) [0.8]<0.2>	ON/OFF (N/D) [≧1]<0.1>	ON/OFF (N/D) [0.6]<0>	ON/OFF (N/D) [≧1]<0.3>	ON/OFF (N/D) [0.8]<0>	ON/OFF (N/D) [0.7]<0>	ON/ON (N/D) [0.4]<0.7>	N/D
Cell No.29	Cell No.13	OFF/ON [0]<0.7>	OFF/ON (N/D) [0]<0.6>	ON/OFF (N/D) [0.9]<0.3>	ON/ON (N/D) [≧1]<0.5>	ON/ON (N/D) [0.7]<0.7>	ON/ON (N/D) [≧1]<≧1>	ON/ON (N/D) [≧1]<≧1>	ON/ON (N/D) [≧1]<≧1>	ON/ON (N/D) [≧1]<0.9>	N/D
Cell No.30	Cell No.14	ON/ON [≧1]<≧1>	ON/ON (N/D) [≧1]<0.6>	ON/OFF (N/D) [0.7]<0.3>	ON/ON (N/D) [≧1]<≧1>	ON/ON (N/D) [0.9]<0.6>	ON/ON (N/D) [0.9]<≧1>	ON/ON (N/D) [≧1]<≧1>	ON/ON (N/D) [≧1]<≧1>	ON/ON (N/D) [≧1]<0.7>	frame out
Cell No.31	Cell No.1	ON/OFF [≧1]<0.3>	ON/OFF (N/D) [0.9]<0.1>	ON/OFF (N/D) [≧1]<0>	ON/ON (N/D) [≧1]<0.6>	ON/ON (N/D) [≧1]<≧1>	ON/ON (N/D) [≧1]<≧1>	frame out
Cell No.32	Cell No.2	ON/ON [0.5]<0.6>	ON/ON (N/D) [0.5]<0.8>	ON/ON (N/D) [0.8]<0.8>	ON/OFF (N/D) [≧1]<0.3>	ON/OFF (N/D) [0.5]<0.1>	ON/OFF (N/D) [0.5]<0.3>	frame out
Cell No.33	Cell No.3	ON/ON [0.6]<0.6>	ON/ON (N/D) [0.7]<≧1>	ON/ON (N/D) [0.5]<0.6>	ON/ON (N/D) [≧1]<0.7>	ON/ON (N/D) [≧1]<0.6>	ON/OFF (N/D) [≧1]<0.1>	ON/OFF (N/D) [≧1]<0>	ON/OFF (N/D) [0.9]<0>	frame out
Cell No.34	Cell No.4	OFF/OFF [0.2]<0.2>	OFF/ON (N/D) [0.1]<0.4>	OFF/ON (N/D) [0]<0.6>	OFF/OFF (N/D) [0.1]<0.2>	OFF/OFF (N/D) [0.3]<0.1>	OFF/OFF (N/D) [0.3]<0>	frame out
Cell No.35	Cell No.5	ON/ON [0.8]<0.4>	ON/OFF (N/D) [0.5]<0.3>	ON/ON (N/D) [0.6]<0.5>	ON/OFF (N/D) [0.6]<0.3>	ON/OFF (N/D) [0.8]<0.3>	ON/ON (N/D) [0.6]<≧1>	ON/ON (N/D) [0.7]<≧1>	ON/ON (N/D) [0.9]<0.8>	ON/ON (N/D) [0.9]<0.5>	N/D
Cell No.36	Cell No.6	ON/ON [0.9]<0.6>	ON/ON (N/D) [0.7]<0.7>	ON/ON (N/D) [≧1]<≧1>	ON/ON (N/D) [≧1]<0.8>	ON/ON (N/D) [0.7]<0.4>	ON/ON (N/D) [≧1]<0.5>	ON/ON (N/D) [0.8]<0.6>	ON/OFF (N/D) [0.7]<0>	ON/ON (N/D) [≧1]<≧1>	N/D
Cell No.37	Cell No.7	ON/OFF [0.8]<0.1>	ON/OFF (N/D) [0.5]<0>	ON/OFF (N/D) [≧1]<0.3>	ON/OFF (N/D) [0.9]<0.1>	ON/OFF (N/D) [0.7]<0.1>	ON/OFF (N/D) [≧1]<0>	ON/OFF (N/D) [≧1]<0.2>	ON/OFF (N/D) [0.6]<0>	ON/OFF (N/D) [0.9]<0>	N/D
Cell No.38	Cell No.8	ON/OFF [≧1]<0.1>	ON/OFF (N/D) [≧1]<0>	ON/ON (N/D) [0.7]<0.8>	ON/OFF (N/D) [0.5]<0.3>	ON/ON (N/D) [0.4]<0.4>	ON/OFF (N/D) [≧1]<0.2>	ON/OFF (N/D) [≧1]<0.1>	ON/OFF (N/D) [≧1]<0.2>	frame out
Cell No.39	Cell No.9	ON/ON [≧1]<≧1>	ON/ON (N/D) [≧1]<0.6>	ON/ON (N/D) [≧1]<0.7>	ON/OFF (N/D) [≧1]<0.2>	ON/OFF (N/D) [0.9]<0.2>	ON/OFF (N/D) [≧1]<0>	ON/OFF (N/D) [≧1]<0>	ON/OFF (N/D) [≧1]<0>	frame out
Cell No.40	Cell No.10	ON/ON [≧1]<≧1>	ON/ON (N/D) [0.7]<0.5>	ON/ON (N/D) [≧1]<≧1>	ON/ON (N/D) [≧1]<≧1>	ON/ON (N/D) [≧1]<≧1>	ON/ON (N/D) [≧1]<0.8>	ON/OFF (N/D) [0.9]<0.3>	ON/ON (N/D) [0.5]<0.6>	frame out
Cell No.41	Cell No.11	OFF/OFF [0.1]<0.3>	OFF/ON (N/D) [0.1]<≧1>	OFF/ON (N/D) [0.2]<0.9>	OFF/ON (N/D) [0.1]<0.7>	OFF/ON (N/D) [0]<0.9>	OFF/ON (N/D) [0.2]<≧1>	OFF/ON (N/D) [0.2]<≧1>	ON/ON (N/D) [≧1]<≧1>	ON/ON (N/D) [0.8]<≧1>	N/D
Cell No.42	Cell No.12	ON/OFF [0.5]<0.3>	ON/OFF (N/D) [0.5]<0.1>	ON/OFF (N/D) [0.9]<0.3>	ON/OFF (N/D) [≧1]<0.2>	ON/ON (N/D) [≧1]<0.5>	ON/ON (N/D) [≧1]<≧1>	frame out
Cell No.43	Cell No.15	OFF/OFF [0.3]<0.3>	OFF/OFF (N/D) [0.2]<0.2>	ON/OFF (N/D) [0.4]<0.2>	OFF/OFF (N/D) [0.2]<0.2>	ON/ON (N/D) [0.8]<0.6>	OFF/OFF (N/D) [0.1]<0>	frame out
Cell No.44	Cell No.16	OFF/OFF [0.1]<0.2>	OFF/OFF (N/D) [0.2]<0.3>	ON/ON (N/D) [0.9]<0.5>	ON/ON (N/D) [0.5]<0.6>	ON/OFF (N/D) [0.6]<0.3>	ON/ON (N/D) [≧1]<≧1>	ON/ON (N/D) [0.9]<≧1>	ON/ON (N/D) [0.4]<0.4>	frame out
Cell No.45	Cell No.17	ON/ON [≧1]<0.7>	ON/ON (N/D) [≧1]<0.6>	ON/ON (N/D) [0.9]<0.7>	ON/ON (N/D) [0.7]<0.4>	ON/OFF (N/D) [0.8]<0.1>	ON/OFF (N/D) [0.5]<0>	frame out
Cell No.46	Cell No.18	ON/ON [0.5]<≧1>	ON/ON (N/D) [0.4]<0.4>	ON/OFF (N/D) [0.8]<0.3>	ON/ON (N/D) [≧1]<0.4>	ON/OFF (N/D) [≧1]<0.1>	ON/OFF (N/D) [≧1]<0>	ON/OFF (N/D) [≧1]<0.1>	ON/OFF (N/D) [≧1]<0>	ON/OFF (N/D) [≧1]<0>	frame out
Cell No.47	Cell No.19	ON/OFF [0.7]<0.2>	ON/ON (N/D) [0.5]<≧1>	ON/ON (N/D) [0.8]<≧1>	ON/ON (N/D) [0.7]<≧1>	ON/ON (N/D) [0.9]<≧1>	ON/OFF (N/D) [≧1]<0.3>	ON/ON (N/D) [≧1]<0.5>	frame out
Cell No.48	Cell No.1	ON/OFF [0.4]<0.2>	OFF/OFF (N/D) [0.1]<0.2>	OFF/OFF (N/D) [0.1]<0.2>	OFF/OFF (N/D) [0]<0.1>	OFF/ON (N/D) [0.1]<0.4>	ON/ON (N/D) [0.4]<0.4>	ON/OFF (N/D) [0.7]<0.2>	ON/OFF (N/D) [0.6]<0>	N/D
Cell No.49	Cell No.2	OFF/OFF [0.3]<0.2>	OFF/OFF (N/D) [0.3]<0.2>	OFF/OFF (N/D) [0.1]<0.1>	OFF/OFF (N/D) [0]<0.2>	ON/ON (N/D) [0.7]<0.8>	ON/ON (N/D) [0.6]<0.4>	ON/ON (N/D) [≧1]<≧1>	ON/ON (N/D) [0.6]<≧1>	N/D
Cell No.50	Cell No.3	ON/OFF [0.7]<0.3>	ON/ON (N/D) [0.8]<0.4>	ON/OFF (N/D) [0.6]<0>	OFF/OFF (N/D) [0.2]<0.2>	OFF/OFF (N/D) [0.1]<0>	OFF/OFF (N/D) [0.1]<0>	frame out
(D) HML-right PEV/TEL-VR PEV/Euchromatin
Original	Parent	Division time 0	Division time 1	Division time 2	Division time 3	Division time 4	Division time 5	Division time 6	Division time 7	Division time 8	Division time 9	Division time 10	Division time 11	Division time 12	Division time 13	Division time 14	Division time 15
Cell Number	Number	(daughter Number)	(daughter Number)	(daughter Number)	(daughter Number)	(daughter Number)	(daughter Number)	(daughter Number)	(daughter Number)	(daughter Number)	(daughter Number)	(daughter Number)	(daughter Number)	(daughter Number)	(daughter Number)	(daughter Number)	(daughter Number)
		[EYFP/mcherry]	[EYFP/mcherry]	[EYFP/mcherry]	[EYFP/mcherry]	[EYFP/mcherry]	[EYFP/mcherry]	[EYFP/mcherry]	[EYFP/mcherry]	[EYFP/mcherry]	[EYFP/mcherry]	[EYFP/mcherry]	[EYFP/mcherry]	[EYFP/mcherry]	[EYFP/mcherry]	[EYFP/mcherry]	[EYFP/mcherry]
		<ECFP/mcherry>	<ECFP/mcherry>	<ECFP/mcherry>	<ECFP/mcherry>	<ECFP/mcherry>	<ECFP/mcherry>	<ECFP/mcherry>	<ECFP/mcherry>	<ECFP/mcherry>	<ECFP/mcherry>	<ECFP/mcherry>	<ECFP/mcherry>	<ECFP/mcherry>	<ECFP/mcherry>	<ECFP/mcherry>	<ECFP/mcherry>
Cell No.1		ON/ON [≧1]<≧1>	ON/ON (Cell No.2) [≧1]<≧1>	ON/ON (Cell No.3) [0.4]<≧1>	ON/ON (Cell No.4) [0.6]<≧1>	ON/ON (Cell No.8) [≧1]<≧1>	ON/OFF (Cell No.12) [≧1]<0.3>	ON/OFF (Cell No.15) [≧1]<0.3>	ON/ON (Cell No.25) [≧1]<≧1>	ON/OFF (N/D) [≧1]<0.1>	ON/OFF (N/D) [≧1]<0.3>	ON/ON (N/D) [≧1]<0.8>	ON/ON (N/D) [≧1]<≧1>	ON/ON (N/D) [≧1]<≧1>	ON/ON (N/D) [≧1]<≧1>	ON/ON (N/D) [≧1]<≧1>	N/D
Cell No.2	Cell No.1	ON/ON [≧1]<≧1>	ON/ON (Cell No.5) [≧1]<0.8>	ON/ON (Cell No.7) [≧1]<≧1>	ON/ON (Cell No.13) [≧1]<0.9>	ON/ON (Cell No.26) [≧1]<≧1>	ON/ON (Cell No.32) [≧1]<≧1>	ON/ON (N/D) [≧1]<≧1>	ON/ON (N/D) [≧1]<≧1>	ON/ON (N/D) [≧1]<≧1>	ON/ON (N/D) [≧1]<≧1>	ON/ON (N/D) [≧1]<≧1>	ON/ON (N/D) [0.6]<0.6>	OFF/ON (N/D) [0.3]<0.9>	ON/ON (N/D) [0.4]<0.9>	N/D
Cell No.3	Cell No.1	ON/ON [≧1]<≧1>	ON/ON (Cell No.6) [≧1]<≧1>	ON/ON (Cell No.9) [≧1]<≧1>	ON/ON (Cell No.27) [0.7]<≧1>	ON/ON (Cell No.39) [≧1]<≧1>	ON/ON (N/D) [0.5]<≧1>	ON/ON (N/D) [0.6]<0.9>	ON/ON (N/D) [0.5]<≧1>	ON/ON (N/D) [0.7]<≧1>	ON/ON (N/D) [≧1]<≧1>	ON/ON (N/D) [0.9]<≧1>	ON/ON (N/D) [0.6]<≧1>	N/D
Cell No.4	Cell No.1	OFF/ON [0]<≧1>	OFF/ON (Cell No.10) [0]<0.9>	OFF/ON (Cell No.17) [0]<0.8>	ON/ON (Cell No.40) [0.5]<0.7>	ON/ON (N/D) [0.9]<≧1>	ON/ON (N/D) [≧1]<≧1>	ON/ON (N/D) [≧1]<≧1>	ON/ON (N/D) [≧1]<≧1>	ON/ON (N/D) [≧1]<0.5>	ON/OFF (N/D) [≧1]<0.3>	N/D
Cell No.5	Cell No.2	ON/ON [0.9]<≧1>	ON/ON (Cell No.11) [≧1]<≧1>	ON/ON (Cell No.19) [≧1]<≧1>	ON/ON (Cell No.33) [≧1]<≧1>	ON/ON (Cell No.47) [≧1]<≧1>	ON/ON (N/D) [0.7]<0.9>	ON/ON (N/D) [≧1]<≧1>	ON/ON (N/D) [0.7]<≧1>	ON/ON (N/D) [0.4]<≧1>	ON/ON (N/D) [0.9]<≧1>	ON/ON (N/D) [0.9]<0.4>	N/D
Cell No.6	Cell No.3	ON/ON [≧1]<≧1>	ON/ON (Cell No.14) [≧1]<≧1>	ON/ON (Cell No.20) [0.8]<≧1>	ON/ON (Cell No.30) [≧1]<≧1>	ON/ON (N/D) [≧1]<≧1>	ON/ON (N/D) [≧1]<≧1>	ON/ON (N/D) [≧1]<≧1>	ON/ON (N/D) [0.9]<≧1>	ON/ON (N/D) [0.8]<0.9>	ON/ON (N/D) [≧1]<≧1>	N/D
Cell No.7	Cell No.2	ON/ON [≧1]<≧1>	ON/ON (Cell No.16) [≧1]<≧1>	ON/ON (Cell No.28) [≧1]<≧1>	ON/ON (Cell No.41) [≧1]<0.7>	ON/ON (N/D) [≧1]<0.6>	ON/ON (N/D) [≧1]<≧1>	ON/ON (N/D) [0.7]<≧1>	ON/ON (N/D) [≧1]<≧1>	ON/ON (N/D) [≧1]<≧1>	ON/ON (N/D) [≧1]<≧1>	N/D
Cell No.8	Cell No.1	ON/ON [≧1]<≧1>	ON/ON (Cell No.21) [0.7]<≧1>	ON/ON (Cell No.42) [0.7]<0.8>	ON/ON (N/D) [≧1]<≧1>	ON/ON (N/D) [0.9]<≧1>	ON/ON (N/D) [≧1]<≧1>	ON/ON (N/D) [≧1]<≧1>	ON/ON (N/D) [≧1]<≧1>	ON/OFF (N/D) [0.6]<0.2>	N/D
Cell No.9	Cell No.3	ON/ON [0.9]<≧1>	ON/ON (Cell No.18) [0.9]<≧1>	ON/ON (N/D) [0.7]<≧1>	ON/ON (N/D) [0.8]<≧1>	ON/ON (N/D) [≧1]<≧1>	ON/ON (N/D) [≧1]<≧1>	OFF/ON (N/D) [0.3]<≧1>	ON/ON (N/D) [0.7]<≧1>	ON/ON (N/D) [0.7]<≧1>	N/D
Cell No.10	Cell No.4	OFF/ON [0]<≧1>	OFF/ON (N/D) [0.1]<≧1>	OFF/ON (N/D) [0]<≧1>	OFF/ON (N/D) [0.3]<≧1>	ON/ON (N/D) [≧1]<≧1>	ON/ON (N/D) [≧1]<≧1>	ON/ON (N/D) [≧1]<≧1>	ON/ON (N/D) [≧1]<≧1>	N/D
Cell No.11	Cell No.5	ON/ON [≧1]<≧1>	ON/ON (Cell No.29) [0.6]<0.7>	ON/ON (N/D) [≧1]<0.5>	ON/ON (N/D) [≧1]<≧1>	ON/ON (N/D) [≧1]<≧1>	death
Cell No.12	Cell No.1	ON/OFF [≧1]<0.3>	ON/ON (Cell No.22) [≧1]<≧1>	ON/ON (Cell No.34) [≧1]<0.4>	ON/ON (N/D) [≧1]<0.6>	ON/ON (N/D) [0.8]<≧1>	ON/ON (N/D) [0.7]<≧1>	ON/ON (N/D) [0.8]<≧1>	ON/ON (N/D) [≧1]<≧1>	ON/ON (N/D) [≧1]<≧1>	ON/ON (N/D) [0.7]<≧1>	N/D
Cell No.13	Cell No.2	ON/ON [≧1]<≧1>	ON/ON (Cell No.23) [≧1]<≧1>	ON/ON (Cell No.35) [≧1]<≧1>	ON/ON (N/D) [≧1]<≧1>	ON/ON (N/D) [0.8]<≧1>	ON/ON (N/D) [0.6]<≧1>	OFF/ON (N/D) [0.2]<≧1>	ON/ON (N/D) [0.6]<≧1>	OFF/ON (N/D) [0.2]<≧1>	OFF/ON (N/D) [0.1]<≧1>	OFF/ON (N/D) [0.1]<≧1>	N/D
Cell No.14	Cell No.6	ON/ON [≧1]<≧1>	ON/ON (Cell No.24) [≧1]<0.8>	ON/ON (N/D) [≧1]<≧1>	ON/ON (N/D) [≧1]<≧1>	ON/ON (N/D) [≧1]<≧1>	ON/ON (N/D) [≧1]<≧1>	ON/ON (N/D) [≧1]<≧1>	N/D
Cell No.15	Cell No.1	ON/OFF [≧1]<0.2>	ON/OFF (Cell No.36) [≧1]<0>	ON/OFF (N/D) [≧1]<0.1>	ON/OFF (N/D) [≧1]<0>	ON/OFF (N/D) [≧1]<0>	ON/OFF (N/D) [0.9]<0.1>	ON/OFF (N/D) [≧1]<0.2>	ON/ON (N/D) [0.9]<0.9>	N/D
Cell No.16	Cell No.7	ON/ON [≧1]<≧1>	ON/ON (Cell No.37) [≧1]<≧1>	ON/ON (N/D) [≧1]<0.5>	ON/ON (N/D) [0.9]<≧1>	ON/ON (N/D) [≧1]<≧1>	ON/ON (N/D) [0.6]<≧1>	OFF/OFF (N/D) [0.3]<0.3>	OFF/OFF (N/D) [0.2]<0.2>	ON/OFF (N/D) [0.6]<0>	N/D
Cell No.17	Cell No.4	OFF/ON [0]<≧1>	OFF/ON (Cell No.45) [0]<≧1>	OFF/ON (N/D) [0]<≧1>	OFF/ON (N/D) [0.1]<≧1>	OFF/ON (N/D) [0.1]<≧1>	OFF/ON (N/D) [0.2]<≧1>	OFF/ON (N/D) [0]<≧1>	OFF/ON (N/D) [0]<0.9>	N/D
Cell No.18	Cell No.9	ON/ON [≧1]<≧1>	ON/ON (N/D) [≧1]<≧1>	ON/ON (N/D) [≧1]<≧1>	ON/ON (N/D) [0.9]<0.7>	ON/ON (N/D) [≧1]<≧1>	ON/ON (N/D) [0.8]<≧1>	ON/ON (N/D) [0.5]<≧1>	ON/ON (N/D) [≧1]<≧1>	N/D
Cell No.19	Cell No.5	ON/ON [≧1]<≧1>	OFF/ON (Cell No.31) [0.3]<≧1>	ON/ON (N/D) [0.4]<≧1>	ON/ON (N/D) [0.4]<≧1>	OFF/ON (N/D) [0.3]<≧1>	ON/ON (N/D) [0.9]<≧1>	ON/ON (N/D) [≧1]<≧1>	ON/ON (N/D) [≧1]<≧1>	ON/ON (N/D) [≧1]<≧1>	N/D
Cell No.20	Cell No.6	ON/ON [0.9]<≧1>	ON/ON (Cell No.38) [≧1]<≧1>	ON/ON (Cell No.48) [0.6]<0.6>	ON/ON (N/D) [0.9]<0.7>	ON/ON (N/D) [0.6]<0.7>	OFF/ON (N/D) [0.2]<≧1>	N/D
Cell No.21	Cell No.8	ON/ON [≧1]<≧1>	ON/ON (Cell No.46) [0.8]<0.9>	ON/ON (N/D) [≧1]<0.9>	ON/ON (N/D) [0.7]<≧1>	ON/ON (N/D) [≧1]<≧1>	ON/ON (N/D) [≧1]<≧1>	ON/ON (N/D) [≧1]<≧1>	ON/ON (N/D) [≧1]<≧1>	N/D
Cell No.22	Cell No.12	ON/ON [≧1]<0.6>	ON/ON (N/D) [≧1]<≧1>	ON/ON (N/D) [≧1]<≧1>	ON/ON (N/D) [0.9]<≧1>	ON/ON (N/D) [≧1]<≧1>	ON/ON (N/D) [≧1]<≧1>	N/D
Cell No.23	Cell No.13	ON/OFF [≧1]<0.2>	ON/OFF (N/D) [≧1]<0.1>	ON/OFF (N/D) [≧1]<0>	ON/OFF (N/D) [0.6]<0.1>	ON/OFF (N/D) [≧1]<0>	ON/OFF (N/D) [0.6]<0>	ON/OFF (N/D) [0.8]<0>	N/D
Cell No.24	Cell No.14	ON/ON [≧1]<≧1>	ON/ON (N/D) [0.7]<0.7>	ON/ON (N/D) [0.6]<0.6>	ON/ON (N/D) [0.7]<0.7>	ON/ON (N/D) [0.5]<0.6>	ON/ON (N/D) [≧1]<≧1>	ON/ON (N/D) [0.9]<≧1>	N/D
Cell No.25	Cell No.1	ON/OFF [≧1]<0.2>	ON/OFF (Cell No.49) [≧1]<0>	ON/OFF (N/D) [≧1]<0>	ON/OFF (N/D) [0.8]<0>	OFF/OFF (N/D) [0.3]<0.1>	ON/OFF (N/D) [0.4]<0>	OFF/OFF (N/D) [0.3]<0>	ON/OFF (N/D) [0.8]<0>	N/D
Cell No.26	Cell No.2	ON/ON [0.9]<≧1>	ON/ON (Cell No.43) [≧1]<0.6>	ON/ON (N/D) [0.7]<0.8>	OFF/OFF (N/D) [0.2]<0.3>	ON/ON (N/D) [0.4]<0.6>	ON/ON (N/D) [0.6]<≧1>	ON/ON (N/D) [≧1]<≧1>	ON/ON (N/D) [0.9]<≧1>	ON/ON (N/D) [0.7]<≧1>	ON/ON (N/D) [0.6]<≧1>	N/D
Cell No.27	Cell No.3	ON/ON [0.9]<≧1>	ON/ON (Cell No.44) [≧1]<0.9>	ON/ON (N/D) [≧1]<0.9>	ON/ON (N/D) [≧1]<0.9>	ON/ON (N/D) [≧1]<≧1>	ON/ON (N/D) [≧1]<≧1>	ON/ON (N/D) [≧1]<≧1>	ON/ON (N/D) [≧1]<≧1>	ON/ON (N/D) [≧1]<≧1>	ON/ON (N/D) [0.5]<0.5>	N/D
Cell No.28	Cell No.7	ON/ON [≧1]<0.9>	ON/ON (N/D) [0.7]<0.9>	ON/ON (N/D) [≧1]<≧1>	ON/ON (N/D) [0.9]<≧1>	OFF/ON (N/D) [0.2]<≧1>	OFF/ON (N/D) [0]<≧1>	OFF/ON (N/D) [0.1]<≧1>	OFF/ON (N/D) [0]<0.4>	N/D
Cell No.29	Cell No.11	ON/ON [0.6]<≧1>	ON/ON (Cell No.50) [0.4]<0.8>	OFF/ON (N/D) [0.3]<0.5>	ON/ON (N/D) [0.4]<0.7>	ON/ON (N/D) [0.6]<≧1>	ON/ON (N/D) [0.4]<≧1>	OFF/ON (N/D) [0.2]<0.9>	N/D
Cell No.30	Cell No.6	ON/ON [0.8]<0.9>	ON/ON (N/D) [≧1]<0.8>	ON/ON (N/D) [≧1]<≧1>	ON/ON (N/D) [0.7]<≧1>	ON/ON (N/D) [0.4]<≧1>	ON/ON (N/D) [0.4]<≧1>	OFF/ON (N/D) [0]<≧1>	ON/ON (N/D) [0.8]<≧1>	ON/ON (N/D) [0.7]<0.7>	N/D
Cell No.31	Cell No.19	ON/ON [0.7]<0.8>	ON/ON (N/D) [0.5]<0.6>	OFF/ON (N/D) [0.3]<0.4>	ON/ON (N/D) [0.9]<≧1>	OFF/ON (N/D) [0.3]<≧1>	ON/ON (N/D) [0.6]<≧1>	ON/ON (N/D) [0.6]<≧1>	N/D
Cell No.32	Cell No.2	ON/ON [≧1]<≧1>	ON/ON (N/D) [≧1]<0.9>	ON/ON (N/D) [≧1]<≧1>	ON/ON (N/D) [≧1]<≧1>	ON/ON (N/D) [≧1]<≧1>	ON/ON (N/D) [≧1]<≧1>	ON/ON (N/D) [≧1]<≧1>	ON/ON (N/D) [≧1]<≧1>	N/D
Cell No.33	Cell No.5	ON/ON [0.8]<0.9>	ON/ON (N/D) [≧1]<0.4>	ON/OFF (N/D) [0.9]<0.3>	ON/ON (N/D) [0.7]<0.7>	ON/ON (N/D) [≧1]<≧1>	ON/ON (N/D) [≧1]<0.4>	ON/ON (N/D) [0.9]<0.9>	N/D
Cell No.34	Cell No.12	ON/ON [0.9]<≧1>	ON/ON (N/D) [0.8]<≧1>	ON/ON (N/D) [0.9]<0.8>	ON/ON (N/D) [0.9]<≧1>	ON/ON (N/D) [≧1]<≧1>	ON/ON (N/D) [0.7]<≧1>	OFF/OFF (N/D) [0.1]<0>	N/D
Cell No.35	Cell No.13	ON/ON [≧1]<≧1>	ON/ON (N/D) [≧1]<0.9>	ON/ON (N/D) [0.6]<≧1>	ON/ON (N/D) [0.6]<≧1>	ON/ON (N/D) [0.9]<≧1>	ON/ON (N/D) [0.7]<≧1>	ON/ON (N/D) [≧1]<≧1>	frame out
Cell No.36	Cell No.15	ON/OFF [≧1]<0>	ON/OFF (N/D) [≧1]<0.1>	ON/OFF (N/D) [≧1]<0>	ON/OFF (N/D) [0.7]<0.1>	ON/OFF (N/D) [0.6]<0>	ON/OFF (N/D) [≧1]<0.1>	ON/OFF (N/D) [≧1]<0>	N/D
Cell No.37	Cell No.16	ON/ON [≧1]<≧1>	ON/ON (N/D) [≧1]<≧1>	ON/ON (N/D) [≧1]<≧1>	ON/ON (N/D) [≧1]<≧1>	ON/ON (N/D) [≧1]<0.9>	ON/ON (N/D) [≧1]<≧1>	N/D
Cell No.38	Cell No.20	ON/ON [0.8]<≧1>	ON/ON (N/D) [0.4]<0.8>	OFF/ON (N/D) [0.2]<≧1>	ON/ON (N/D) [0.6]<≧1>	ON/ON (N/D) [≧1]<≧1>	ON/ON (N/D) [0.7]<≧1>	frame out
Cell No.39	Cell No.3	ON/ON [≧1]<≧1>	ON/ON (N/D) [≧1]<≧1>	ON/ON (N/D) [0.8]<≧1>	ON/ON (N/D) [0.5]<≧1>	ON/ON (N/D) [0.9]<≧1>	ON/ON (N/D) [≧1]<≧1>	ON/ON (N/D) [0.8]<≧1>	N/D
Cell No.40	Cell No.4	OFF/ON [0.1]<0.9>	OFF/ON (N/D) [0]<≧1>	OFF/ON (N/D) [0]<0.8>	OFF/ON (N/D) [0]<≧1>	ON/ON (N/D) [0.8]<≧1>	ON/ON (N/D) [≧1]<≧1>	ON/ON (N/D) [0.7]<≧1>	ON/ON (N/D) [0.7]<≧1>	ON/ON (N/D) [0.7]<≧1>	N/D
Cell No.41	Cell No.7	ON/ON [≧1]<0.9>	ON/ON (N/D) [0.8]<0.7>	ON/ON (N/D) [0.9]<0.9>	ON/ON (N/D) [≧1]<0.7>	ON/ON (N/D) [≧1]<≧1>	ON/ON (N/D) [≧1]<0.7>	ON/ON (N/D) [≧1]<0.5>	ON/ON (N/D) [0.9]<≧1>	ON/ON (N/D) [≧1]<≧1>	N/D
Cell No.42	Cell No.8	ON/ON [≧1]<0.5>	ON/ON (N/D) [0.9]<0.5>	ON/ON (N/D) [0.7]<0.8>	ON/ON (N/D) [≧1]<≧1>	ON/ON (N/D) [≧1]<≧1>	ON/ON (N/D) [0.7]<≧1>	OFF/ON (N/D) [0.3]<0.4>	N/D
Cell No.43	Cell No.26	ON/ON [0.9]<0.6>	ON/ON (N/D) [≧1]<0.7>	ON/ON (N/D) [≧1]<≧1>	ON/ON (N/D) [0.8]<≧1>	ON/ON (N/D) [0.8]<≧1>	ON/ON (N/D) [0.5]<0.4>	OFF/ON (N/D) [0.1]<≧1>	N/D
Cell No.44	Cell No.27	ON/ON [0.7]<0.7>	ON/ON (N/D) [0.6]<0.5>	ON/ON (N/D) [0.8]<≧1>	ON/ON (N/D) [≧1]<0.9>	ON/ON (N/D) [0.6]<0.9>	ON/ON (N/D) [0.5]<≧1>	N/D
Cell No.45	Cell No.17	OFF/ON [0]<≧1>	OFF/ON (N/D) [0.1]<≧1>	ON/ON (N/D) [0.7]<≧1>	ON/ON (N/D) [0.6]<≧1>	ON/ON (N/D) [≧1]<≧1>	ON/ON (N/D) [≧1]<≧1>	N/D
Cell No.46	Cell No.21	ON/ON [0.7]<≧1>	ON/ON (N/D) [0.9]<0.7>	ON/ON (N/D) [≧1]<0.6>	ON/ON (N/D) [≧1]<≧1>	ON/ON (N/D) [≧1]<≧1>	ON/ON (N/D) [≧1]<≧1>	ON/ON (N/D) [≧1]<≧1>	N/D
Cell No.47	Cell No.5	ON/ON [≧1]<≧1>	ON/ON (N/D) [0.8]<0.8>	ON/ON (N/D) [0.8]<≧1>	ON/ON (N/D) [≧1]<≧1>	ON/ON (N/D) [0.9]<≧1>	OFF/ON (N/D) [0.3]<0.4>	N/D
Cell No.48	Cell No.20	ON/ON [0.6]<0.4>	ON/ON (N/D) [0.9]<0.8>	ON/ON (N/D) [≧1]<≧1>	ON/ON (N/D) [0.7]<0.8>	ON/ON (N/D) [0.7]<≧1>	ON/ON (N/D) [0.9]<0.9>	N/D
Cell No.49	Cell No.25	ON/OFF [0.8]<0>	ON/OFF (N/D) [0.8]<0>	ON/OFF (N/D) [0.8]<0>	ON/OFF (N/D) [≧1]<0>	ON/OFF (N/D) [≧1]<0>	ON/OFF (N/D) [≧1]<0>	frame out
Cell No.50	Cell No.29	ON/ON [≧1]<0.8>	ON/ON (N/D) [≧1]<≧1>	ON/ON (N/D) [0.7]<≧1>	ON/ON (N/D) [0.8]<≧1>	ON/ON (N/D) [0.9]<≧1>	OFF/ON (N/D) [0.3]<≧1>	ON/ON (N/D) [0.6]<0.8>	frame out
(E) HML-right PEV/HMR-right PEV/Euchromatin
Original	Parent	Division time 0	Division time 1	Division time 2	Division time 3	Division time 4	Division time 5	Division time 6	Division time 7	Division time 8	Division time 9	Division time 10	Division time 11	Division time 12	Division time 13	Division time 14	Division time 15
Cell Number	Number	(daughter Number)	(daughter Number)	(daughter Number)	(daughter Number)	(daughter Number)	(daughter Number)	(daughter Number)	(daughter Number)	(daughter Number)	(daughter Number)	(daughter Number)	(daughter Number)	(daughter Number)	(daughter Number)	(daughter Number)	(daughter Number)
		[ECFP/mcherry]	[ECFP/mcherry]	[ECFP/mcherry]	[ECFP/mcherry]	[ECFP/mcherry]	[ECFP/mcherry]	[ECFP/mcherry]	[ECFP/mcherry]	[ECFP/mcherry]	[ECFP/mcherry]	[ECFP/mcherry]	[ECFP/mcherry]	[ECFP/mcherry]	[ECFP/mcherry]	[ECFP/mcherry]	[ECFP/mcherry]
		<EYFP/mcherry>	<EYFP/mcherry>	<EYFP/mcherry>	<EYFP/mcherry>	<EYFP/mcherry>	<EYFP/mcherry>	<EYFP/mcherry>	<EYFP/mcherry>	<EYFP/mcherry>	<EYFP/mcherry>	<EYFP/mcherry>	<EYFP/mcherry>	<EYFP/mcherry>	<EYFP/mcherry>	<EYFP/mcherry>	<EYFP/mcherry>
Cell No.1		ON/ON [≧1]<≧1>	ON/ON (Cell No.2) [≧1]<≧1>	ON/ON (N/D) [≧1]<≧1>	ON/ON (Cell No.4) [≧1]<≧1>	ON/ON (Cell No.6) [0.7]<0.7>	ON/ON (Cell No.8) [0.5]<0.5>	ON/ON (Cell No.15) [≧1]<0.9>	ON/ON (Cell No.28) [0.9]<0.7>	ON/ON (N/D) [≧1]<≧1>	ON/ON (N/D) [0.8]<0.6>	ON/ON (N/D) [0.4]<0.5>	OFF/ON (N/D) [0.2]<0.4>	ON/ON (N/D) [0.5]<≧1>	ON/ON (N/D) [0.6]<≧1>	ON/ON (N/D) [0.9]<0.7>	N/D
Cell No.2	Cell No.1	ON/ON [≧1]<≧1>	ON/ON (Cell No.3) [≧1]<≧1>	ON/ON (Cell No.5) [0.8]<0.5>	ON/ON (Cell No.9) [0.7]<≧1>	ON/ON (Cell No.16) [0.9]<0.6>	ON/ON (Cell No.20) [0.5]<0.5>	ON/ON (N/D) [0.4]<0.8>	ON/ON (N/D) [0.4]<0.6>	OFF/ON (N/D) [0.3]<≧1>	OFF/ON (N/D) [0.3]<0.9>	OFF/ON (N/D) [0.2]<0.9>	ON/ON (N/D) [0.7]<≧1>	N/D
Cell No.3	Cell No.2	ON/ON [≧1]<0.5>	ON/ON (Cell No.7) [≧1]<0.7>	ON/ON (N/D) [0.8]<0.4>	ON/ON (Cell No.21) [≧1]<0.6>	ON/OFF (Cell No.29) [0.4]<0.2>	OFF/OFF (N/D) [0.1]<0>	OFF/OFF (N/D) [0.3]<0>	OFF/OFF (N/D) [0.1]<0>	OFF/OFF (N/D) [0]<0>	OFF/OFF (N/D) [0]<0>	OFF/OFF (N/D) [0.2]<0>	OFF/OFF (N/D) [0.3]<0>	N/D
Cell No.4	Cell No.1	ON/ON [0.6]<≧1>	ON/ON (Cell No.10) [≧1]<≧1>	ON/ON (Cell No.12) [≧1]<≧1>	ON/ON (N/D) [≧1]<≧1>	ON/ON (Cell No.39) [≧1]<0.8>	ON/ON (N/D) [≧1]<≧1>	ON/ON (N/D) [≧1]<≧1>	ON/ON (N/D) [0.5]<≧1>	ON/ON (N/D) [0.6]<0.8>	ON/ON (N/D) [≧1]<0.5>	N/D
Cell No.5	Cell No.2	ON/ON [≧1]<0.7>	ON/ON (Cell No.11) [≧1]<≧1>	ON/ON (Cell No.17) [≧1]<≧1>	ON/ON (Cell No.30) [0.6]<0.5>	ON/ON (Cell No.40) [≧1]<0.7>	ON/ON (N/D) [≧1]<0.9>	ON/ON (N/D) [≧1]<≧1>	ON/ON (N/D) [0.6]<0.9>	ON/ON (N/D) [0.9]<≧1>	ON/ON (N/D) [0.5]<≧1>	N/D
Cell No.6	Cell No.1	ON/ON [≧1]<0.7>	ON/OFF (Cell No.13) [0.8]<0.3>	ON/ON (Cell No.18) [≧1]<≧1>	OFF/ON (Cell No.31) [0.3]<0.6>	OFF/ON (N/D) [0.2]<0.8>	ON/ON (N/D) [0.4]<0.4>	ON/ON (N/D) [0.7]<0.5>	ON/ON (N/D) [0.6]<0.6>	ON/ON (N/D) [0.7]<0.8>	ON/ON (N/D) [≧1]<0.8>	ON/ON (N/D) [≧1]<0.9>	N/D
Cell No.7	Cell No.3	ON/ON [≧1]<≧1>	ON/ON (Cell No.14) [0.7]<0.8>	ON/ON (Cell No.22) [0.6]<0.7>	ON/ON (Cell No.41) [0.4]<0.6>	ON/ON (N/D) [0.6]<≧1>	ON/ON (N/D) [0.8]<0.5>	ON/ON (N/D) [≧1]<≧1>	ON/ON (N/D) [0.6]<0.9>	ON/ON (N/D) [0.9]<0.7>	ON/ON (N/D) [0.5]<0.6>	OFF/OFF (N/D) [0]<0.2>	N/D
Cell No.8	Cell No.1	ON/ON [≧1]<≧1>	ON/ON (Cell No.23) [≧1]<≧1>	ON/ON (Cell No.32) [≧1]<0.8>	ON/ON (N/D) [≧1]<0.6>	ON/OFF (N/D) [0.5]<0.2>	ON/OFF (N/D) [0.9]<0.1>	ON/OFF (N/D) [0.4]<0.1>	OFF/OFF (N/D) [0.3]<0.1>	OFF/OFF (N/D) [0]<0.2>	OFF/OFF (N/D) [0.1]<0>	frame out
Cell No.9	Cell No.2	ON/ON [0.8]<≧1>	ON/ON (Cell No.24) [≧1]<≧1>	ON/ON (Cell No.33) [0.7]<0.8>	ON/ON (N/D) [0.9]<0.8>	ON/ON (N/D) [0.5]<0.9>	ON/ON (N/D) [0.6]<≧1>	ON/ON (N/D) [0.4]<0.9>	ON/ON (N/D) [0.5]<0.8>	ON/ON (N/D) [≧1]<≧1>	ON/ON (N/D) [0.7]<0.7>	ON/ON (N/D) [0.4]<0.5>	N/D
Cell No.10	Cell No.4	ON/ON [0.7]<≧1>	ON/ON (Cell No.19) [≧1]<≧1>	ON/ON (Cell No.34) [≧1]<≧1>	ON/ON (N/D) [≧1]<≧1>	ON/ON (N/D) [0.9]<0.9>	ON/ON (N/D) [≧1]<0.7>	ON/ON (N/D) [0.6]<≧1>	ON/ON (N/D) [0.8]<≧1>	ON/ON (N/D) [≧1]<0.9>	ON/ON (N/D) [≧1]<≧1>	ON/ON (N/D) [≧1]<≧1>	ON/ON (N/D) [0.6]<0.7>	N/D
Cell No.11	Cell No.5	ON/ON [0.7]<0.7>	ON/ON (Cell No.25) [0.7]<0.7>	ON/ON (Cell No.42) [0.6]<0.6>	ON/ON (N/D) [0.4]<0.9>	OFF/ON (N/D) [0.3]<0.7>	ON/ON (N/D) [0.4]<0.8>	ON/ON (N/D) [0.5]<0.5>	ON/OFF (N/D) [0.7]<0.3>	ON/ON (N/D) [0.8]<0.4>	ON/OFF (N/D) [≧1]<0>	N/D
Cell No.12	Cell No.4	ON/ON [≧1]<≧1>	ON/ON (Cell No.26) [≧1]<≧1>	ON/ON (Cell No.43) [0.8]<≧1>	ON/ON (N/D) [≧1]<≧1>	ON/ON (N/D) [0.9]<0.8>	ON/ON (N/D) [0.4]<0.6>	ON/ON (N/D) [0.4]<0.6>	ON/ON (N/D) [0.4]<0.5>	OFF/ON (N/D) [0.2]<≧1>	ON/ON (N/D) [≧1]<0.9>	OFF/OFF (N/D) [0.3]<0>	N/D
Cell No.13	Cell No.6	ON/OFF [0.8]<0.2>	OFF/OFF (Cell No.27) [0.2]<0>	ON/ON (Cell No.44) [≧1]<0.4>	ON/ON (N/D) [0.9]<0.8>	ON/ON (N/D) [0.8]<0.7>	ON/ON (N/D) [0.5]<0.6>	ON/ON (N/D) [0.7]<≧1>	ON/ON (N/D) [≧1]<0.6>	ON/ON (N/D) [≧1]<0.6>	ON/ON (N/D) [≧1]<≧1>	N/D
Cell No.14	Cell No.7	ON/ON [0.9]<≧1>	ON/ON (Cell No.35) [0.9]<0.8>	ON/ON (N/D) [≧1]<≧1>	ON/ON (N/D) [≧1]<≧1>	ON/ON (N/D) [0.8]<≧1>	ON/ON (N/D) [0.5]<≧1>	ON/ON (N/D) [0.7]<0.9>	ON/ON (N/D) [0.8]<0.4>	OFF/OFF (N/D) [0]<0.3>	ON/ON (N/D) [0.7]<0.6>	OFF/ON (N/D) [0.1]<0.4>	frame out
Cell No.15	Cell No.1	ON/ON [≧1]<0.4>	ON/ON (N/D) [0.7]<0.5>	ON/ON (N/D) [≧1]<≧1>	ON/ON (N/D) [≧1]<≧1>	ON/ON (N/D) [0.8]<0.7>	ON/ON (N/D) [≧1]<0.8>	OFF/OFF (N/D) [0]<0>	N/D
Cell No.16	Cell No.2	ON/OFF [0.6]<0.2>	OFF/OFF (Cell No.36) [0.3]<0.2>	ON/ON (Cell No.45) [0.7]<≧1>	ON/ON (N/D) [≧1]<0.9>	ON/ON (N/D) [0.7]<0.7>	ON/ON (N/D) [0.8]<≧1>	ON/ON (N/D) [0.4]<0.8>	N/D
Cell No.17	Cell No.5	ON/ON [≧1]<≧1>	ON/ON (Cell No.37) [≧1]<≧1>	ON/ON (N/D) [0.8]<≧1>	ON/ON (N/D) [0.7]<0.7>	ON/ON (N/D) [0.5]<0.5>	ON/ON (N/D) [0.6]<0.5>	OFF/ON (N/D) [0.1]<0.4>	OFF/ON (N/D) [0]<≧1>	frame out
Cell No.18	Cell No.6	ON/ON [≧1]<0.9>	OFF/ON (Cell No.38) [0.3]<0.9>	OFF/ON (N/D) [0.2]<0.9>	OFF/ON (N/D) [0.1]<0.9>	OFF/ON (N/D) [0.1]<≧1>	OFF/ON (N/D) [0.3]<≧1>	ON/ON (N/D) [0.5]<0.9>	OFF/ON (N/D) [0]<0.6>	ON/ON (N/D) [0.6]<≧1>	OFF/ON (N/D) [0.2]<≧1>	OFF/ON (N/D) [0.2]<≧1>	frame out
Cell No.19	Cell No.10	ON/ON [≧1]<≧1>	ON/ON (Cell No.46) [≧1]<≧1>	ON/ON (N/D) [≧1]<≧1>	OFF/ON (N/D) [0.3]<0.8>	OFF/ON (N/D) [0.1]<0.5>	ON/ON (N/D) [0.4]<0.5>	ON/ON (N/D) [0.9]<0.5>	ON/ON (N/D) [0.9]<0.4>	ON/ON (N/D) [≧1]<0.4>	ON/ON (N/D) [≧1]<0.7>	N/D
Cell No.20	Cell No.2	OFF/ON [0.2]<0.4>	ON/OFF (N/D) [0.7]<0.3>	ON/OFF (N/D) [0.8]<0.3>	ON/ON (N/D) [≧1]<0.7>	ON/ON (N/D) [≧1]<0.6>	ON/OFF (N/D) [0.5]<0.3>	ON/ON (N/D) [0.5]<0.4>	ON/ON (N/D) [≧1]<0.5>	ON/ON (N/D) [≧1]<0.7>	N/D
Cell No.21	Cell No.3	ON/OFF [0.8]<0.3>	ON/OFF (Cell No.47) [≧1]<0.1>	ON/OFF (N/D) [0.8]<0.2>	ON/OFF (N/D) [0.6]<0.1>	OFF/OFF (N/D) [0.1]<0.2>	OFF/OFF (N/D) [0]<0.2>	OFF/OFF (N/D) [0]<0.2>	OFF/OFF (N/D) [0]<0>	N/D
Cell No.22	Cell No.7	ON/ON [0.5]<0.5>	ON/ON (N/D) [≧1]<≧1>	ON/ON (N/D) [0.6]<0.8>	ON/ON (N/D) [0.6]<0.6>	ON/ON (N/D) [0.5]<0.6>	ON/ON (N/D) [≧1]<≧1>	ON/ON (N/D) [≧1]<0.4>	ON/OFF (N/D) [0.8]<0.1>	ON/OFF (N/D) [0.7]<0.2>	OFF/ON (N/D) [0]<0.8>	frame out
Cell No.23	Cell No.8	ON/ON [0.5]<≧1>	ON/ON (Cell No.48) [0.9]<≧1>	ON/OFF (N/D) [≧1]<0.3>	ON/OFF (N/D) [0.5]<0.1>	OFF/OFF (N/D) [0.3]<0>	OFF/OFF (N/D) [0.3]<0>	OFF/OFF (N/D) [0.3]<0.2>	ON/OFF (N/D) [0.7]<0.1>	N/D
Cell No.24	Cell No.9	ON/ON [≧1]<0.9>	ON/ON (Cell No.49) [≧1]<0.9>	ON/ON (N/D) [≧1]<≧1>	ON/ON (N/D) [≧1]<0.8>	ON/ON (N/D) [0.4]<0.8>	ON/ON (N/D) [0.5]<0.5>	ON/ON (N/D) [0.5]<0.7>	ON/ON (N/D) [≧1]<0.9>	ON/ON (N/D) [0.7]<0.5>	N/D
Cell No.25	Cell No.11	ON/ON [0.4]<0.4>	ON/ON (Cell No.50) [0.8]<0.4>	ON/ON (N/D) [0.9]<0.4>	ON/ON (N/D) [≧1]<0.5>	ON/OFF (N/D) [0.7]<0.2>	OFF/OFF (N/D) [0.3]<0.3>	OFF/ON (N/D) [0.3]<0.8>	OFF/ON (N/D) [0]<0.6>	OFF/OFF (N/D) [0.2]<0.2>	N/D
Cell No.26	Cell No.12	ON/ON [≧1]<0.8>	ON/ON (N/D) [≧1]<0.7>	ON/ON (N/D) [≧1]<≧1>	ON/ON (N/D) [≧1]<0.8>	ON/ON (N/D) [0.5]<0.5>	ON/ON (N/D) [0.9]<0.6>	ON/ON (N/D) [0.7]<0.6>	ON/ON (N/D) [≧1]<0.8>	ON/ON (N/D) [0.7]<≧1>	ON/ON (N/D) [0.8]<0.6>	N/D
Cell No.27	Cell No.13	ON/OFF [0.4]<0>	ON/OFF (N/D) [0.5]<0>	ON/OFF (N/D) [0.6]<0.1>	ON/OFF (N/D) [0.6]<0.3>	ON/OFF (N/D) [0.5]<0.3>	OFF/OFF (N/D) [0.3]<0.2>	OFF/OFF (N/D) [0]<0.3>	ON/ON (N/D) [0.6]<0.7>	frame out
Cell No.28	Cell No.1	ON/ON [0.4]<0.6>	ON/ON (N/D) [≧1]<≧1>	ON/ON (N/D) [≧1]<0.8>	ON/ON (N/D) [0.8]<0.4>	ON/OFF (N/D) [0.6]<0.3>	ON/OFF (N/D) [0.5]<0.3>	ON/ON (N/D) [≧1]<≧1>	ON/ON (N/D) [0.6]<≧1>	N/D
Cell No.29	Cell No.3	ON/ON [0.8]<0.4>	ON/OFF (N/D) [0.6]<0.3>	ON/OFF (N/D) [0.4]<0.3>	OFF/OFF (N/D) [0.3]<0.1>	OFF/OFF (N/D) [0.1]<0.1>	OFF/OFF (N/D) [0]<0>	OFF/OFF (N/D) [0]<0>	OFF/OFF (N/D) [0]<0>	frame out
Cell No.30	Cell No.5	OFF/ON [0.3]<0.5>	ON/ON (N/D) [≧1]<≧1>	ON/ON (N/D) [≧1]<0.8>	ON/ON (N/D) [0.6]<0.4>	ON/ON (N/D) [0.4]<0.5>	ON/ON (N/D) [0.7]<0.4>	ON/ON (N/D) [≧1]<≧1>	ON/ON (N/D) [0.6]<0.9>	frame out
Cell No.31	Cell No.6	ON/ON [0.6]<0.5>	ON/ON (N/D) [0.7]<0.4>	OFF/OFF (N/D) [0.3]<0.1>	ON/ON (N/D) [0.9]<0.4>	ON/ON (N/D) [0.5]<0.5>	ON/ON (N/D) [0.4]<0.4>	ON/ON (N/D) [0.5]<0.4>	ON/ON (N/D) [≧1]<0.6>	ON/ON (N/D) [0.6]<0.9>	N/D
Cell No.32	Cell No.8	ON/ON [0.6]<0.5>	ON/ON (N/D) [0.5]<0.7>	ON/ON (N/D) [0.7]<0.7>	OFF/ON (N/D) [0.3]<0.4>	OFF/ON (N/D) [0.3]<0.5>	OFF/ON (N/D) [0]<0.8>	ON/ON (N/D) [0.4]<0.8>	frame out
Cell No.33	Cell No.9	ON/ON [≧1]<≧1>	ON/ON (N/D) [≧1]<0.6>	ON/ON (N/D) [0.8]<0.9>	ON/ON (N/D) [0.5]<0.5>	ON/OFF (N/D) [0.5]<0.2>	ON/ON (N/D) [0.5]<0.8>	ON/ON (N/D) [0.4]<≧1>	OFF/ON (N/D) [0.3]<0.6>	N/D
Cell No.34	Cell No.10	ON/ON [0.8]<0.9>	ON/ON (N/D) [≧1]<≧1>	ON/ON (N/D) [≧1]<≧1>	ON/ON (N/D) [0.8]<0.6>	ON/ON (N/D) [0.5]<0.5>	OFF/ON (N/D) [0.2]<0.4>	ON/ON (N/D) [0.5]<0.5>	OFF/OFF (N/D) [0]<0.2>	OFF/ON (N/D) [0.1]<0.7>	frame out
Cell No.35	Cell No.14	ON/ON [0.7]<0.6>	ON/ON (N/D) [0.8]<0.9>	ON/ON (N/D) [≧1]<0.7>	ON/ON (N/D) [0.9]<0.9>	ON/ON (N/D) [≧1]<0.6>	ON/ON (N/D) [0.5]<≧1>	ON/ON (N/D) [0.8]<0.8>	ON/ON (N/D) [0.5]<0.9>	ON/ON (N/D) [0.4]<0.7>	ON/ON (N/D) [0.5]<0.7>	N/D
Cell No.36	Cell No.16	OFF/OFF [0.3]<0.2>	ON/ON (N/D) [0.9]<0.6>	ON/ON (N/D) [0.6]<0.4>	ON/ON (N/D) [≧1]<0.4>	ON/OFF (N/D) [0.7]<0.3>	ON/ON (N/D) [0.9]<0.5>	ON/ON (N/D) [≧1]<0.9>	ON/ON (N/D) [0.7]<0.9>	N/D
Cell No.37	Cell No.17	ON/ON [0.7]<0.7>	ON/ON (N/D) [0.7]<0.7>	ON/ON (N/D) [0.7]<0.5>	OFF/ON (N/D) [0.3]<0.6>	OFF/ON (N/D) [0.3]<0.4>	OFF/OFF (N/D) [0.1]<0.3>	OFF/OFF (N/D) [0]<0.3>	frame out
Cell No.38	Cell No.18	ON/ON [0.6]<0.6>	ON/ON (N/D) [≧1]<≧1>	ON/ON (N/D) [0.9]<0.6>	ON/ON (N/D) [0.7]<0.6>	ON/ON (N/D) [0.5]<0.4>	ON/OFF (N/D) [0.5]<0.3>	ON/ON (N/D) [0.7]<0.6>	ON/ON (N/D) [0.6]<0.6>	ON/ON (N/D) [≧1]<0.6>	OFF/ON (N/D) [0]<0.9>	frame out
Cell No.39	Cell No.4	ON/ON [≧1]<0.6>	ON/ON (N/D) [≧1]<0.5>	ON/OFF (N/D) [0.4]<0.1>	ON/OFF (N/D) [0.4]<0.1>	OFF/OFF (N/D) [0.1]<0>	ON/OFF (N/D) [0.7]<0.3>	ON/OFF (N/D) [0.5]<0.1>	N/D
Cell No.40	Cell No.5	ON/ON [0.6]<0.5>	ON/ON (N/D) [0.8]<0.7>	ON/ON (N/D) [0.6]<0.4>	ON/OFF (N/D) [0.4]<0.2>	OFF/OFF (N/D) [0.1]<0.3>	ON/ON (N/D) [0.6]<≧1>	OFF/ON (N/D) [0]<0.6>	N/D
Cell No.41	Cell No.7	ON/ON [0.8]<0.5>	ON/ON (N/D) [0.6]<0.7>	ON/ON (N/D) [0.9]<0.8>	ON/ON (N/D) [0.8]<0.6>	ON/ON (N/D) [0.4]<0.6>	OFF/ON (N/D) [0.3]<0.5>	ON/ON (N/D) [0.5]<≧1>	ON/ON (N/D) [0.5]<0.6>	N/D
Cell No.42	Cell No.11	ON/ON [0.7]<0.6>	ON/ON (N/D) [0.5]<0.4>	ON/ON (N/D) [0.5]<0.4>	ON/OFF (N/D) [0.6]<0.3>	ON/ON (N/D) [0.8]<0.5>	ON/ON (N/D) [0.9]<0.7>	OFF/ON (N/D) [0]<0.4>	N/D
Cell No.43	Cell No.12	ON/ON [0.8]<0.8>	ON/ON (N/D) [≧1]<≧1>	ON/ON (N/D) [0.9]<≧1>	ON/ON (N/D) [0.6]<0.9>	ON/ON (N/D) [0.7]<≧1>	ON/ON (N/D) [0.4]<≧1>	OFF/ON (N/D) [0.1]<0.8>	ON/ON (N/D) [0.6]<0.7>	OFF/ON (N/D) [0.2]<0.9>	ON/ON (N/D) [0.8]<≧1>	N/D
Cell No.44	Cell No.13	ON/ON [0.7]<0.5>	ON/ON (N/D) [≧1]<0.5>	ON/ON (N/D) [0.7]<0.4>	ON/ON (N/D) [0.8]<0.5>	ON/ON (N/D) [0.5]<0.4>	ON/ON (N/D) [0.6]<0.4>	ON/ON (N/D) [0.5]<0.6>	OFF/OFF (N/D) [0]<0>	frame out
Cell No.45	Cell No.16	ON/ON [0.8]<≧1>	ON/ON (N/D) [0.6]<0.5>	OFF/OFF (N/D) [0.2]<0.3>	ON/OFF (N/D) [0.4]<0.2>	ON/OFF (N/D) [0.5]<0.2>	ON/ON (N/D) [0.9]<0.6>	ON/ON (N/D) [≧1]<≧1>	N/D
Cell No.46	Cell No.19	ON/ON [≧1]<≧1>	ON/ON (N/D) [≧1]<0.7>	ON/ON (N/D) [≧1]<0.6>	ON/ON (N/D) [0.4]<0.5>	ON/ON (N/D) [0.7]<0.4>	OFF/ON (N/D) [0.3]<0.8>	ON/ON (N/D) [≧1]<≧1>	ON/ON (N/D) [≧1]<≧1>	OFF/ON (N/D) [0.2]<≧1>	frame out
Cell No.47	Cell No.21	ON/ON [≧1]<≧1>	ON/ON (N/D) [0.7]<0.4>	ON/ON (N/D) [0.4]<0.8>	ON/ON (N/D) [0.5]<0.5>	OFF/ON (N/D) [0.1]<0.4>	OFF/ON (N/D) [0.3]<0.5>	OFF/OFF (N/D) [0.2]<0.3>	OFF/OFF (N/D) [0.3]<0.3>	N/D
Cell No.48	Cell No.23	ON/ON [≧1]<≧1>	ON/ON (N/D) [0.9]<0.8>	ON/ON (N/D) [0.6]<0.7>	ON/ON (N/D) [0.7]<0.5>	ON/OFF (N/D) [0.9]<0.2>	ON/OFF (N/D) [≧1]<0.2>	ON/ON (N/D) [0.7]<0.6>	N/D
Cell No.49	Cell No.24	ON/ON [0.8]<0.6>	ON/ON (N/D) [0.8]<0.5>	ON/ON (N/D) [0.5]<0.6>	OFF/ON (N/D) [0.3]<0.5>	OFF/OFF (N/D) [0.3]<0.3>	OFF/ON (N/D) [0]<0.6>	ON/ON (N/D) [0.4]<0.9>	N/D
Cell No.50	Cell No.25	ON/ON [0.4]<≧1>	ON/ON (N/D) [0.4]<0.8>	ON/ON (N/D) [0.4]<0.6>	OFF/OFF (N/D) [0.3]<0.3>	OFF/OFF (N/D) [0.1]<0.2>	ON/ON (N/D) [0.6]<0.4>	OFF/OFF (N/D) [0]<0>	frame out
